# Supplementary material for: Assessment of Modifiable Factors for the Association of Marital Status With Cancer-Specific Survival
Source: PubMed Central journal article supplement (PMC8164101; doi:10.1001/jamanetworkopen.2021.11813), 2021-05-28
Supplement: jamanetwopen-e2111813-s001.pdf [file jamanetwopen-e2111813-s001.pdf]

## Supplemental Online Content

Chen ZH, Yang KB, Zhang YZ, et al. Assessment of modifiable factors for the association of marital status with cancer-specific survival. *JAMA Netw Open*. 2021;4(5):e2111813.  
doi:10.1001/jamanetworkopen.2021.11813

**eFigure 1.** Evaluation of the Appropriateness of Weibull Distribution in AFT Models Assessing the Association Between Marital Status and Cancer-Specific Survival for the Following Cancer Sites: Breast, Lung, Prostate, Colorectum, Melanoma, Bladder, Kidney, Endometrium, and Pancreas

**eTable 1.** Patient Demographic and Clinical Characteristics by Marital Status and Cancer Site

**eFigure 2.** Survival Curves of Cancer-Specific Survival of Cancer of the Lung, Colorectum, Melanoma, Bladder, Kidney, Pancreas, and Breast by Marital Status and Sex

**eTable 2.** Associations Between Cancer-Specific Survival and Marital Status (Married vs Unmarried), Stage at Diagnosis, and Treatment

**eTable 3.** Associations Between Cancer-Specific Survival and Marital Status (Married vs Unmarried), Stage at Diagnosis, and Treatment by Cancer Site and Histological Subtype

**eTable 4.** Mediation Analyses of Direct and Indirect Effects of Marital Status on Cancer-Specific Survival Mediated by Stage at Diagnosis and Treatment and Receiving Radiation Therapy

**eTable 5.** Mediation Analyses of Direct and Indirect Effects of Marital Status on Cancer-Specific Survival Mediated by Stage at Diagnosis and Treatment by Histological Subtype

**eTable 6.** Mediation Analyses of Direct and Indirect Effects of Marital Status on Cancer-Specific Survival Mediated by Stage at Diagnosis and Treatment by Sex

**eTable 7.** Demographic and Clinical Characteristics of Individuals Included and Excluded

This supplemental material has been provided by the authors to give readers additional information about their work.

**eFigure 1.** Evaluation of the Appropriateness of Weibull Distribution in AFT Models Assessing the Association Between Marital Status and Cancer-Specific Survival for the Following Cancer Sites: Breast, Lung, Prostate, Colorectum, Melanoma, Bladder, Kidney, Endometrium, and Pancreas

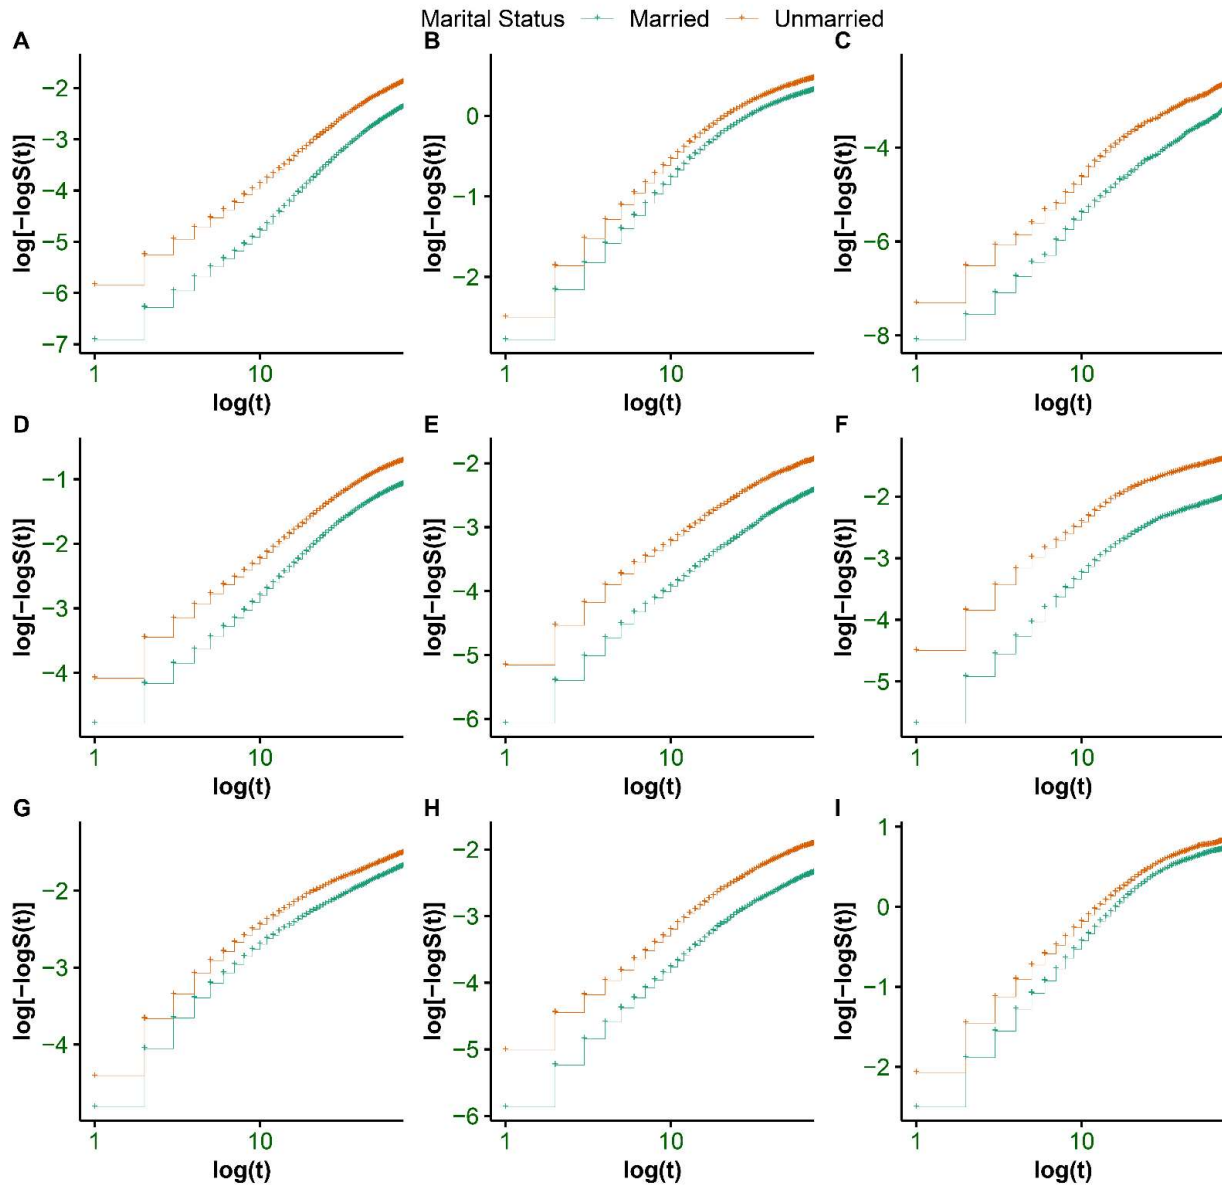

eTable 1. Patient Demographic and Clinical Characteristics by Marital Status and Cancer Site

| Characteristics               | Total Sample     |                  |          | Breast           |                  |          | Lung             |                  |          | Prostate          |                  |          |
|-------------------------------|------------------|------------------|----------|------------------|------------------|----------|------------------|------------------|----------|-------------------|------------------|----------|
|                               | Married          | Unmarried        | <i>P</i> | Married          | Unmarried        | <i>P</i> | Married          | Unmarried        | <i>P</i> | Married           | Unmarried        | <i>P</i> |
|                               | 1067726          | 666180           |          | 259555           | 186601           |          | 146391           | 127669           |          | 287143            | 96782            |          |
| Age at diagnosis <sup>a</sup> | 63.05<br>(11.74) | 64.89<br>(13.79) | <0.001   | 58.25<br>(12.24) | 63.16<br>(14.56) | <0.001   | 67.26<br>(10.28) | 67.87<br>(11.43) | <0.001   | 65.46<br>(8.71)   | 65.14<br>(9.50)  | <0.001   |
| Race <sup>b</sup>             |                  |                  | <0.001   |                  |                  | <0.001   |                  |                  | <0.001   |                   |                  | <0.001   |
| White                         | 883655<br>(82.8) | 509551<br>(76.5) |          | 212617<br>(81.9) | 140483<br>(75.3) |          | 121240<br>(82.8) | 99304<br>(77.8)  |          | 230879<br>(80.4)  | 67121<br>(69.4)  |          |
| Black                         | 88389<br>(8.3)   | 112906<br>(16.9) |          | 18009<br>(6.9)   | 31463<br>(16.9)  |          | 11267<br>(7.7)   | 21225<br>(16.6)  |          | 36093<br>(12.6)   | 24908<br>(25.7)  |          |
| Others <sup>c</sup>           | 87585<br>(8.2)   | 39835<br>(6.0)   |          | 27613<br>(10.6)  | 13714<br>(7.3)   |          | 13626<br>(9.3)   | 6917<br>(5.4)    |          | 16621<br>(5.8)    | 3580<br>(3.7)    |          |
| Unknown                       | 8097<br>(0.8)    | 3888<br>(0.6)    |          | 1316<br>(0.5)    | 941<br>(0.5)     |          | 258<br>(0.2)     | 223<br>(0.2)     |          | 3550<br>(1.2)     | 1173<br>(1.2)    |          |
| Sex <sup>b</sup>              |                  |                  | <0.001   |                  |                  | <0.001   |                  |                  | <0.001   |                   |                  | <0.001   |
| Female                        | 478681<br>(44.8) | 415698<br>(62.4) |          | 257331<br>(99.1) | 185593<br>(99.5) |          | 56406<br>(38.5)  | 73394<br>(57.5)  |          |                   |                  |          |
| Male                          | 589045<br>(55.2) | 250482<br>(37.6) |          | 2224<br>(0.9)    | 1008<br>(0.5)    |          | 89985<br>(61.5)  | 54275<br>(42.5)  |          | 287143<br>(100.0) | 96782<br>(100.0) |          |
| Grade <sup>b</sup>            |                  |                  | <0.001   |                  |                  | <0.001   |                  |                  | <0.001   |                   |                  | <0.001   |
| Grade I                       | 126551<br>(11.9) | 80027<br>(12.0)  |          | 56790<br>(21.9)  | 38231<br>(20.5)  |          | 8312<br>(5.7)    | 6221<br>(4.9)    |          | 22102<br>(7.7)    | 7612<br>(7.9)    |          |
| Grade II                      | 383913<br>(36.0) | 228578<br>(34.3) |          | 108196<br>(41.7) | 76796<br>(41.2)  |          | 26540<br>(18.1)  | 21324<br>(16.7)  |          | 119954<br>(41.8)  | 37760<br>(39.0)  |          |
| Grade III                     | 309987<br>(29.0) | 178684<br>(26.8) |          | 81178<br>(31.3)  | 60111<br>(32.2)  |          | 38553<br>(26.3)  | 32959<br>(25.8)  |          | 137400<br>(47.9)  | 47277<br>(48.8)  |          |
| Grade IV                      | 35305<br>(3.3)   | 25483<br>(3.8)   |          | 1192<br>(0.5)    | 939<br>(0.5)     |          | 5083<br>(3.5)    | 4560<br>(3.6)    |          | 472<br>(0.2)      | 240<br>(0.2)     |          |
| Unknown                       | 211970<br>(19.9) | 153408<br>(23.0) |          | 12199<br>(4.7)   | 10524<br>(5.6)   |          | 67903<br>(46.4)  | 62605<br>(49.0)  |          | 7215<br>(2.5)     | 3893<br>(4.0)    |          |

eTable 1 cont.

| Characteristics                 | Total Sample     |                  |          | Breast           |                  |          | Lung             |                  |          | Prostate         |                 |          |
|---------------------------------|------------------|------------------|----------|------------------|------------------|----------|------------------|------------------|----------|------------------|-----------------|----------|
|                                 | Married          | Unmarried        | <i>P</i> | Married          | Unmarried        | <i>P</i> | Married          | Unmarried        | <i>P</i> | Married          | Unmarried       | <i>P</i> |
|                                 | 1067726          | 666180           |          | 259555           | 186601           |          | 146391           | 127669           |          | 287143           | 96782           |          |
| <b>Surgery<sup>b</sup></b>      |                  |                  | <0.001   |                  |                  | <0.001   |                  |                  | <0.001   |                  |                 | <0.001   |
| <b>No</b>                       | 317376<br>(29.7) | 219538<br>(33.0) |          | 11755<br>(4.5)   | 16310<br>(8.7)   |          | 107078<br>(73.1) | 100184<br>(78.5) |          | 149111<br>(51.9) | 59887<br>(61.9) |          |
| <b>Yes</b>                      | 750350<br>(70.3) | 446642<br>(67.0) |          | 247800<br>(95.5) | 170291<br>(91.3) |          | 39313<br>(26.9)  | 27485<br>(21.5)  |          | 138032<br>(48.1) | 36895<br>(38.1) |          |
| <b>Radiation<sup>b</sup></b>    |                  |                  | <0.001   |                  |                  | <0.001   |                  |                  | <0.001   |                  |                 | <0.001   |
| <b>No/Unknown</b>               | 711213<br>(66.6) | 448228<br>(67.3) |          | 117187<br>(45.1) | 96243<br>(51.6)  |          | 79872<br>(54.6)  | 71315<br>(55.9)  |          | 187570<br>(65.3) | 61289<br>(63.3) |          |
| <b>Yes</b>                      | 356513<br>(33.4) | 217952<br>(32.7) |          | 142368<br>(54.9) | 90358<br>(48.4)  |          | 66519<br>(45.4)  | 56354<br>(44.1)  |          | 99573<br>(34.7)  | 35493<br>(36.7) |          |
| <b>Chemotherapy<sup>b</sup></b> |                  |                  | <0.001   |                  |                  | <0.001   |                  |                  | <0.001   |                  |                 | <0.001   |
| <b>No/Unknown</b>               | 751265<br>(70.4) | 456478<br>(68.5) |          | 142721<br>(55.0) | 114570<br>(61.4) |          | 62616<br>(42.8)  | 65693<br>(51.5)  |          | 284576<br>(99.1) | 95550<br>(98.7) |          |
| <b>Yes</b>                      | 316461<br>(29.6) | 209702<br>(31.5) |          | 116834<br>(45.0) | 72031<br>(38.6)  |          | 83775<br>(57.2)  | 61976<br>(48.5)  |          | 2567<br>(0.9)    | 1232<br>(1.3)   |          |
| <b>Stage<sup>b</sup></b>        |                  |                  | <0.001   |                  |                  | <0.001   |                  |                  | <0.001   |                  |                 | <0.001   |
| <b>Early</b>                    | 760931<br>(71.3) | 429026<br>(64.4) |          | 222976<br>(85.9) | 152277<br>(81.6) |          | 42196<br>(28.8)  | 35925<br>(28.1)  |          | 242680<br>(84.5) | 79180<br>(81.8) |          |
| <b>Advanced</b>                 | 306795<br>(28.7) | 237154<br>(35.6) |          | 36579<br>(14.1)  | 34324<br>(18.4)  |          | 104195<br>(71.2) | 91744<br>(71.9)  |          | 44463<br>(15.5)  | 17602<br>(18.2) |          |
| <b>Insurance<sup>b</sup></b>    |                  |                  | <0.001   |                  |                  | <0.001   |                  |                  | <0.001   |                  |                 | <0.001   |
| <b>Insured</b>                  | 960622<br>(90.0) | 514788<br>(77.3) |          | 235173<br>(90.6) | 146260<br>(78.4) |          | 128801<br>(88.0) | 93827<br>(73.5)  |          | 261955<br>(91.2) | 78997<br>(81.6) |          |
| <b>Medicaid</b>                 | 64888<br>(6.1)   | 116159<br>(17.4) |          | 18208<br>(7.0)   | 34021<br>(18.2)  |          | 12855<br>(8.8)   | 27039<br>(21.2)  |          | 9962<br>(3.5)    | 10932<br>(11.3) |          |
| <b>Uninsured</b>                | 17243<br>(1.6)   | 22719<br>(3.4)   |          | 3280<br>(1.3)    | 4151<br>(2.2)    |          | 3134<br>(2.1)    | 5139<br>(4.0)    |          | 3031<br>(1.1)    | 2844<br>(2.9)   |          |
| <b>Unknown</b>                  | 24973<br>(2.3)   | 12514<br>(1.9)   |          | 2894<br>(1.1)    | 2169<br>(1.2)    |          | 1601<br>(1.1)    | 1664<br>(1.3)    |          | 12195<br>(4.2)   | 4009<br>(4.1)   |          |

eTable 1 cont.

| Characteristics              | Total Sample     |                  |          | Breast           |                  |          | Lung             |                  |          | Prostate         |                 |          |
|------------------------------|------------------|------------------|----------|------------------|------------------|----------|------------------|------------------|----------|------------------|-----------------|----------|
|                              | Married          | Unmarried        | <i>P</i> | Married          | Unmarried        | <i>P</i> | Married          | Unmarried        | <i>P</i> | Married          | Unmarried       | <i>P</i> |
| 1067726                      | 666180           | 259555           |          | 186601           | 146391           |          | 127669           | 287143           |          | 96782            |                 |          |
| <b>Poverty<sup>a</sup></b>   | 32.02<br>(9.57)  | 33.00<br>(9.50)  | <0.001   | 31.64<br>(9.39)  | 32.70<br>(9.33)  | <0.001   | 32.97<br>(9.92)  | 33.60<br>(9.77)  | <0.001   | 31.79<br>(9.53)  | 33.17<br>(9.53) | <0.001   |
| <b>Education<sup>a</sup></b> | 14.71<br>(6.20)  | 15.12<br>(6.10)  | <0.001   | 14.54<br>(6.14)  | 15.01<br>(6.05)  | <0.001   | 15.08<br>(6.35)  | 15.21<br>(6.20)  | <0.001   | 14.60<br>(6.13)  | 15.20<br>(6.01) | <0.001   |
| <b>Residence<sup>b</sup></b> |                  |                  | <0.001   |                  |                  | <0.001   |                  |                  | <0.001   |                  |                 | <0.001   |
| <b>Metropolitan</b>          | 939181<br>(88.0) | 591974<br>(88.9) |          | 232835<br>(89.7) | 168658<br>(90.4) |          | 123404<br>(84.3) | 110042<br>(86.2) |          | 255010<br>(88.8) | 86575<br>(89.5) |          |
| <b>Nonmetropolitan</b>       | 127647<br>(12.0) | 73611<br>(11.0)  |          | 26467<br>(10.2)  | 17759<br>(9.5)   |          | 22817<br>(15.6)  | 17483<br>(13.7)  |          | 32045<br>(11.2)  | 10167<br>(10.5) |          |
| <b>Unknown</b>               | 898<br>(0.1)     | 595<br>(0.1)     |          | 253<br>(0.1)     | 184<br>(0.1)     |          | 170<br>(0.1)     | 144<br>(0.1)     |          | 88<br>(0.0)      | 40<br>(0.0)     |          |

eTable 1 cont.

| Characteristics               | Colorectum       |                  |          | Melanoma         |                  |          | Bladder          |                  |          | Kidney           |                  |          |
|-------------------------------|------------------|------------------|----------|------------------|------------------|----------|------------------|------------------|----------|------------------|------------------|----------|
|                               | Married          | Unmarried        | <i>P</i> | Married          | Unmarried        | <i>P</i> | Married          | Unmarried        | <i>P</i> | Married          | Unmarried        | <i>P</i> |
|                               | 135567           | 104409           |          | 67135            | 31666            |          | 31189            | 20564            |          | 57392            | 32936            |          |
| Age at diagnosis <sup>a</sup> | 63.70<br>(12.82) | 66.69<br>(14.91) | <0.001   | 59.68<br>(14.37) | 58.03<br>(19.45) | <0.001   | 70.30<br>(11.02) | 71.56<br>(13.10) | <0.001   | 61.10<br>(11.89) | 60.54<br>(14.47) | <0.001   |
| Race <sup>b</sup>             |                  |                  | <0.001   |                  |                  | <0.001   |                  |                  | <0.001   |                  |                  | <0.001   |
| White                         | 108889<br>(80.3) | 78895<br>(75.6)  |          | 65035<br>(96.9)  | 30506<br>(96.3)  |          | 27826<br>(89.2)  | 17461<br>(84.9)  |          | 48239<br>(84.1)  | 25338<br>(76.9)  |          |
| Black                         | 11268<br>(8.3)   | 17295<br>(16.6)  |          | 216 (0.3)        | 305<br>(1.0)     |          | 1383<br>(4.4)    | 2153<br>(10.5)   |          | 4624<br>(8.1)    | 5543<br>(16.8)   |          |
| Others <sup>c</sup>           | 14716<br>(10.9)  | 7793<br>(7.5)    |          | 609 (0.9)        | 363<br>(1.1)     |          | 1846<br>(5.9)    | 861<br>(4.2)     |          | 4058<br>(7.1)    | 1826<br>(5.5)    |          |
| Unknown                       | 694 (0.5)        | 426<br>(0.4)     |          | 1275<br>(1.9)    | 492<br>(1.6)     |          | 134 (0.4)        | 89<br>(0.4)      |          | 471 (0.8)        | 229<br>(0.7)     |          |
| Sex <sup>b</sup>              |                  |                  | <0.001   |                  |                  | <0.001   |                  |                  | <0.001   |                  |                  | <0.001   |
| Female                        | 53558<br>(39.5)  | 60503<br>(57.9)  |          | 26003<br>(38.7)  | 16537<br>(52.2)  |          | 4890<br>(15.7)   | 7651<br>(37.2)   |          | 17506<br>(30.5)  | 15534<br>(47.2)  |          |
| Male                          | 82009<br>(60.5)  | 43906<br>(42.1)  |          | 41132<br>(61.3)  | 15129<br>(47.8)  |          | 26299<br>(84.3)  | 12913<br>(62.8)  |          | 39886<br>(69.5)  | 17402<br>(52.8)  |          |
| Grade <sup>b</sup>            |                  |                  | <0.001   |                  |                  | <0.001   |                  |                  | <0.001   |                  |                  | <0.001   |
| Grade I                       | 12291<br>(9.1)   | 9002<br>(8.6)    |          | 108 (0.2)        | 37<br>(0.1)      |          | 986 (3.2)        | 655<br>(3.2)     |          | 5218<br>(9.1)    | 3037<br>(9.2)    |          |
| Grade II                      | 86670<br>(63.9)  | 65058<br>(62.3)  |          | 170 (0.3)        | 81<br>(0.3)      |          | 2921<br>(9.4)    | 1885<br>(9.2)    |          | 22688<br>(39.5)  | 12572<br>(38.2)  |          |
| Grade III                     | 19407<br>(14.3)  | 15809<br>(15.1)  |          | 293 (0.4)        | 162<br>(0.5)     |          | 6989<br>(22.4)   | 4734<br>(23.0)   |          | 13885<br>(24.2)  | 7440<br>(22.6)   |          |
| Grade IV                      | 3171<br>(2.3)    | 2730<br>(2.6)    |          | 103 (0.2)        | 73<br>(0.2)      |          | 17519<br>(56.2)  | 11224<br>(54.6)  |          | 4960<br>(8.6)    | 2878<br>(8.7)    |          |
| Unknown                       | 14028<br>(10.3)  | 11810<br>(11.3)  |          | 66461<br>(99.0)  | 31313<br>(98.9)  |          | 2774<br>(8.9)    | 2066<br>(10.0)   |          | 10641<br>(18.5)  | 7009<br>(21.3)   |          |

eTable 1 cont.

| Characteristics                 | Colorectum       |                 |          | Melanoma        |                 |          | Bladder         |                 |          | Kidney          |                 |          |
|---------------------------------|------------------|-----------------|----------|-----------------|-----------------|----------|-----------------|-----------------|----------|-----------------|-----------------|----------|
|                                 | Married          | Unmarried       | <i>P</i> | Married         | Unmarried       | <i>P</i> | Married         | Unmarried       | <i>P</i> | Married         | Unmarried       | <i>P</i> |
|                                 | 135567           | 104409          |          | 67135           | 31666           |          | 31189           | 20564           |          | 57392           | 32936           |          |
| <b>Surgery<sup>b</sup></b>      |                  |                 | <0.001   |                 |                 | <0.001   |                 |                 | <0.001   |                 |                 | <0.001   |
| <b>No</b>                       | 14010<br>(10.3)  | 14956<br>(14.3) |          | 3035 (4.5)      | 1905<br>(6.0)   |          | 1125<br>(3.6)   | 1132<br>(5.5)   |          | 4986<br>(8.7)   | 4141<br>(12.6)  |          |
| <b>Yes</b>                      | 121557<br>(89.7) | 89453<br>(85.7) |          | 64100<br>(95.5) | 29761<br>(94.0) |          | 30064<br>(96.4) | 19432<br>(94.5) |          | 52406<br>(91.3) | 28795<br>(87.4) |          |
| <b>Radiation<sup>b</sup></b>    |                  |                 | <0.001   |                 |                 | <0.001   |                 |                 | <0.001   |                 |                 | <0.001   |
| <b>No/Unknown</b>               | 114023<br>(84.1) | 89232<br>(85.5) |          | 65172<br>(97.1) | 30417<br>(96.1) |          | 28403<br>(91.1) | 18109<br>(88.1) |          | 54692<br>(95.3) | 31247<br>(94.9) |          |
| <b>Yes</b>                      | 21544<br>(15.9)  | 15177<br>(14.5) |          | 1963 (2.9)      | 1249<br>(3.9)   |          | 2786<br>(8.9)   | 2455<br>(11.9)  |          | 2700<br>(4.7)   | 1689<br>(5.1)   |          |
| <b>Chemotherapy<sup>b</sup></b> |                  |                 | <0.001   |                 |                 | <0.001   |                 |                 | <0.001   |                 |                 | <0.001   |
| <b>No/Unknown</b>               | 73477<br>(54.2)  | 62568<br>(59.9) |          | 65513<br>(97.6) | 30626<br>(96.7) |          | 20094<br>(64.4) | 13974<br>(68.0) |          | 51284<br>(89.4) | 29516<br>(89.6) |          |
| <b>Yes</b>                      | 62090<br>(45.8)  | 41841<br>(40.1) |          | 1622 (2.4)      | 1040<br>(3.3)   |          | 11095<br>(35.6) | 6590<br>(32.0)  |          | 6108<br>(10.6)  | 3420<br>(10.4)  |          |
| <b>Stage<sup>b</sup></b>        |                  |                 | <0.001   |                 |                 | <0.001   |                 |                 | <0.001   |                 |                 | <0.001   |
| <b>Early</b>                    | 74593<br>(55.0)  | 55235<br>(52.9) |          | 59267<br>(88.3) | 26438<br>(83.5) |          | 24515<br>(78.6) | 15274<br>(74.3) |          | 40604<br>(70.7) | 22940<br>(69.7) |          |
| <b>Advanced</b>                 | 60974<br>(45.0)  | 49174<br>(47.1) |          | 7868<br>(11.7)  | 5228<br>(16.5)  |          | 6674<br>(21.4)  | 5290<br>(25.7)  |          | 16788<br>(29.3) | 9996<br>(30.3)  |          |
| <b>Insurance<sup>b</sup></b>    |                  |                 | <0.001   |                 |                 | <0.001   |                 |                 | <0.001   |                 |                 | <0.001   |
| <b>Insured</b>                  | 119381<br>(88.1) | 78474<br>(75.2) |          | 60430<br>(90.0) | 25927<br>(81.9) |          | 28470<br>(91.3) | 16365<br>(79.6) |          | 51640<br>(90.0) | 24320<br>(73.8) |          |
| <b>Medicaid</b>                 | 10967 (8.1)      | 19840<br>(19.0) |          | 1442 (2.1)      | 2955<br>(9.3)   |          | 1776<br>(5.7)   | 3165<br>(15.4)  |          | 3996<br>(7.0)   | 6721<br>(20.4)  |          |
| <b>Uninsured</b>                | 3345 (2.5)       | 4614<br>(4.4)   |          | 965 (1.4)       | 1152<br>(3.6)   |          | 435 (1.4)       | 699<br>(3.4)    |          | 1140<br>(2.0)   | 1506<br>(4.6)   |          |
| <b>Unknown</b>                  | 1874 (1.4)       | 1481<br>(1.4)   |          | 4298 (6.4)      | 1632<br>(5.2)   |          | 508 (1.6)       | 335<br>(1.6)    |          | 616 (1.1)       | 389<br>(1.2)    |          |

eTable 1 cont.

| Characteristics              | Colorectum    |              |          | Melanoma     |              |          | Bladder      |              |          | Kidney       |              |          |
|------------------------------|---------------|--------------|----------|--------------|--------------|----------|--------------|--------------|----------|--------------|--------------|----------|
|                              | Married       | Unmarried    | <i>P</i> | Married      | Unmarried    | <i>P</i> | Married      | Unmarried    | <i>P</i> | Married      | Unmarried    | <i>P</i> |
|                              | 135567        | 104409       |          | 67135        | 31666        |          | 31189        | 20564        |          | 57392        | 32936        |          |
| <b>Poverty<sup>a</sup></b>   | 32.67 (9.64)  | 33.31 (9.51) | <0.001   | 30.80 (9.17) | 31.47 (9.01) | <0.001   | 31.98 (9.53) | 32.70 (9.52) | <0.001   | 32.80 (9.69) | 33.54 (9.48) | <0.001   |
| <b>Education<sup>a</sup></b> | 15.20 (6.33)  | 15.40 (6.17) | <0.001   | 13.85 (5.90) | 14.38 (5.91) | <0.001   | 14.72 (6.22) | 15.08 (6.16) | <0.001   | 15.14 (6.38) | 15.41 (6.25) | <0.001   |
| <b>Residence<sup>b</sup></b> |               |              | <0.001   |              |              | <0.001   |              |              | <0.001   |              |              | <0.001   |
| <b>Metropolitan</b>          | 117408 (86.6) | 91984 (88.1) |          | 59427 (88.5) | 28367 (89.6) |          | 27222 (87.3) | 18088 (88.0) |          | 50057 (87.2) | 29148 (88.5) |          |
| <b>Nonmetropolitan</b>       | 17930 (13.2)  | 12278 (11.8) |          | 7694 (11.5)  | 3292 (10.4)  |          | 3952 (12.7)  | 2467 (12.0)  |          | 7274 (12.7)  | 3757 (11.4)  |          |
| <b>Unknown</b>               | 229 (0.2)     | 147 (0.1)    |          | 14 (0.0)     | 7 (0.0)      |          | 15 (0.0)     | 9 (0.0)      |          | 61 (0.1)     | 31 (0.1)     |          |



eTable 1 cont.

| Characteristic                | Endometrium      |                  |          | Pancreas         |                |          |
|-------------------------------|------------------|------------------|----------|------------------|----------------|----------|
|                               | Married          | Unmarried        | <i>P</i> | Married          | Unmarried      | <i>P</i> |
|                               | 49528            | 42479            |          | 33826            | 23074          |          |
| Age at diagnosis <sup>a</sup> | 60.47<br>(10.40) | 62.72<br>(12.70) | <0.001   | 65.78<br>(10.97) | 66.91 (12.95)  | <0.001   |
| Race <sup>b</sup>             |                  |                  | <0.001   |                  |                | <0.001   |
| White                         | 41197 (83.2)     | 33210<br>(78.2)  |          | 27733<br>(82.0)  | 17233 (74.7)   |          |
| Black                         | 2774 (5.6)       | 5836<br>(13.7)   |          | 2755<br>(8.1)    | 4178<br>(18.1) |          |
| Others <sup>c</sup>           | 5235 (10.6)      | 3169<br>(7.5)    |          | 3261<br>(9.6)    | 1612<br>(7.0)  |          |
| Unknown                       | 322 (0.7)        | 264<br>(0.6)     |          | 77<br>(0.2)      | 51<br>(0.2)    |          |
| Sex <sup>b</sup>              |                  |                  | <0.001   |                  |                | <0.001   |
| Female                        | 49528<br>(100.0) | 42479<br>(100.0) |          | 13459<br>(39.8)  | 14007 (60.7)   |          |
| Male                          |                  |                  |          | 20367<br>(60.2)  | 9067<br>(39.3) |          |
| Grade <sup>b</sup>            |                  |                  | <0.001   |                  |                | <0.001   |
| Grade I                       | 18481 (37.3)     | 13873<br>(32.7)  |          | 2263<br>(6.7)    | 1359<br>(5.9)  |          |
| Grade II                      | 10976 (22.2)     | 9521<br>(22.4)   |          | 5798<br>(17.1)   | 3581<br>(15.5) |          |
| Grade III                     | 6877 (13.9)      | 6891<br>(16.2)   |          | 5405<br>(16.0)   | 3301<br>(14.3) |          |
| Grade IV                      | 2436 (4.9)       | 2621<br>(6.2)    |          | 369<br>(1.1)     | 218<br>(0.9)   |          |
| Unknown                       | 10758 (21.7)     | 9573<br>(22.5)   |          | 19991<br>(59.1)  | 14615 (63.3)   |          |

eTable 1 cont.

| Characteristic                  | Endometrium  |              |          | Pancreas     |              |          |
|---------------------------------|--------------|--------------|----------|--------------|--------------|----------|
|                                 | Married      | Unmarried    | <i>P</i> | Married      | Unmarried    | <i>P</i> |
|                                 | <b>49528</b> | <b>42479</b> |          | <b>33826</b> | <b>23074</b> |          |
| <b>Surgery<sup>b</sup></b>      |              |              | <0.001   |              |              | <0.001   |
| <b>No</b>                       | 1729 (3.5)   | 3012 (7.1)   |          | 24547 (72.6) | 18011 (78.1) |          |
| <b>Yes</b>                      | 47799 (96.5) | 39467 (92.9) |          | 9279 (27.4)  | 5063 (21.9)  |          |
| <b>Radiation<sup>b</sup></b>    |              |              | <0.001   |              |              | <0.001   |
| <b>No/Unknown</b>               | 37063 (74.8) | 31061 (73.1) |          | 27231 (80.5) | 19315 (83.7) |          |
| <b>Yes</b>                      | 12465 (25.2) | 11418 (26.9) |          | 6595 (19.5)  | 3759 (16.3)  |          |
| <b>Chemotherapy<sup>b</sup></b> |              |              | <0.001   |              |              | <0.001   |
| <b>No/Unknown</b>               | 40174 (81.1) | 33713 (79.4) |          | 10810 (32.0) | 10268 (44.5) |          |
| <b>Yes</b>                      | 9354 (18.9)  | 8766 (20.6)  |          | 23016 (68.0) | 12806 (55.5) |          |
| <b>Stage<sup>b</sup></b>        |              |              | <0.001   |              |              | <0.001   |
| <b>Early</b>                    | 40991 (82.8) | 32955 (77.6) |          | 13109 (38.8) | 8802 (38.1)  |          |
| <b>Advanced</b>                 | 8537 (17.2)  | 9524 (22.4)  |          | 20717 (61.2) | 14272 (61.9) |          |
| <b>Insurance<sup>b</sup></b>    |              |              | <0.001   |              |              | <0.001   |
| <b>Insured</b>                  | 44571 (90.0) | 33131 (78.0) |          | 30201 (89.3) | 17487 (75.8) |          |
| <b>Medicaid</b>                 | 3161 (6.4)   | 7142 (16.8)  |          | 2521 (7.5)   | 4344 (18.8)  |          |
| <b>Uninsured</b>                | 1194 (2.4)   | 1684 (4.0)   |          | 719 (2.1)    | 930 (4.0)    |          |
| <b>Unknown</b>                  | 602 (1.2)    | 522 (1.2)    |          | 385 (1.1)    | 313 (1.4)    |          |

eTable 1 cont.

| Characteristic               | Endometrium  |                 |          | Pancreas        |               |          |
|------------------------------|--------------|-----------------|----------|-----------------|---------------|----------|
|                              | Married      | Unmarried       | <i>P</i> | Married         | Unmarried     | <i>P</i> |
|                              | <b>49528</b> | <b>42479</b>    |          | <b>33826</b>    | <b>23074</b>  |          |
| <b>Poverty<sup>a</sup></b>   | 31.65 (9.52) | 32.34<br>(9.38) | <0.001   | 32.00<br>(9.52) | 32.75 (9.51)  | <0.001   |
| <b>Education<sup>a</sup></b> | 14.50 (6.19) | 14.88<br>(6.07) | <0.001   | 14.72<br>(6.18) | 14.95 (6.07)  | <0.001   |
| <b>Residence<sup>b</sup></b> |              |                 | <0.001   |                 |               | <0.001   |
| <b>Metropolitan</b>          | 43837 (88.5) | 38337<br>(90.2) |          | 29981<br>(88.6) | 20775 (90.0)  |          |
| <b>Nonmetropolitan</b>       | 5658 (11.4)  | 4124<br>(9.7)   |          | 3810<br>(11.3)  | 2284<br>(9.9) |          |
| <b>Unknown</b>               | 33<br>(0.1)  | 18<br>(0.0)     |          | 35<br>(0.1)     | 15<br>(0.1)   |          |

<sup>a</sup>mean (SD); <sup>b</sup>N (%); <sup>c</sup>include American Indian, AK Native, Asian and Pacific Islander

eFigure 2. Survival Curves of Cancer-Specific Survival of Cancer of the Lung, Colorectum, Melanoma, Bladder, Kidney, Pancreas, and Breast by Marital Status and Sex

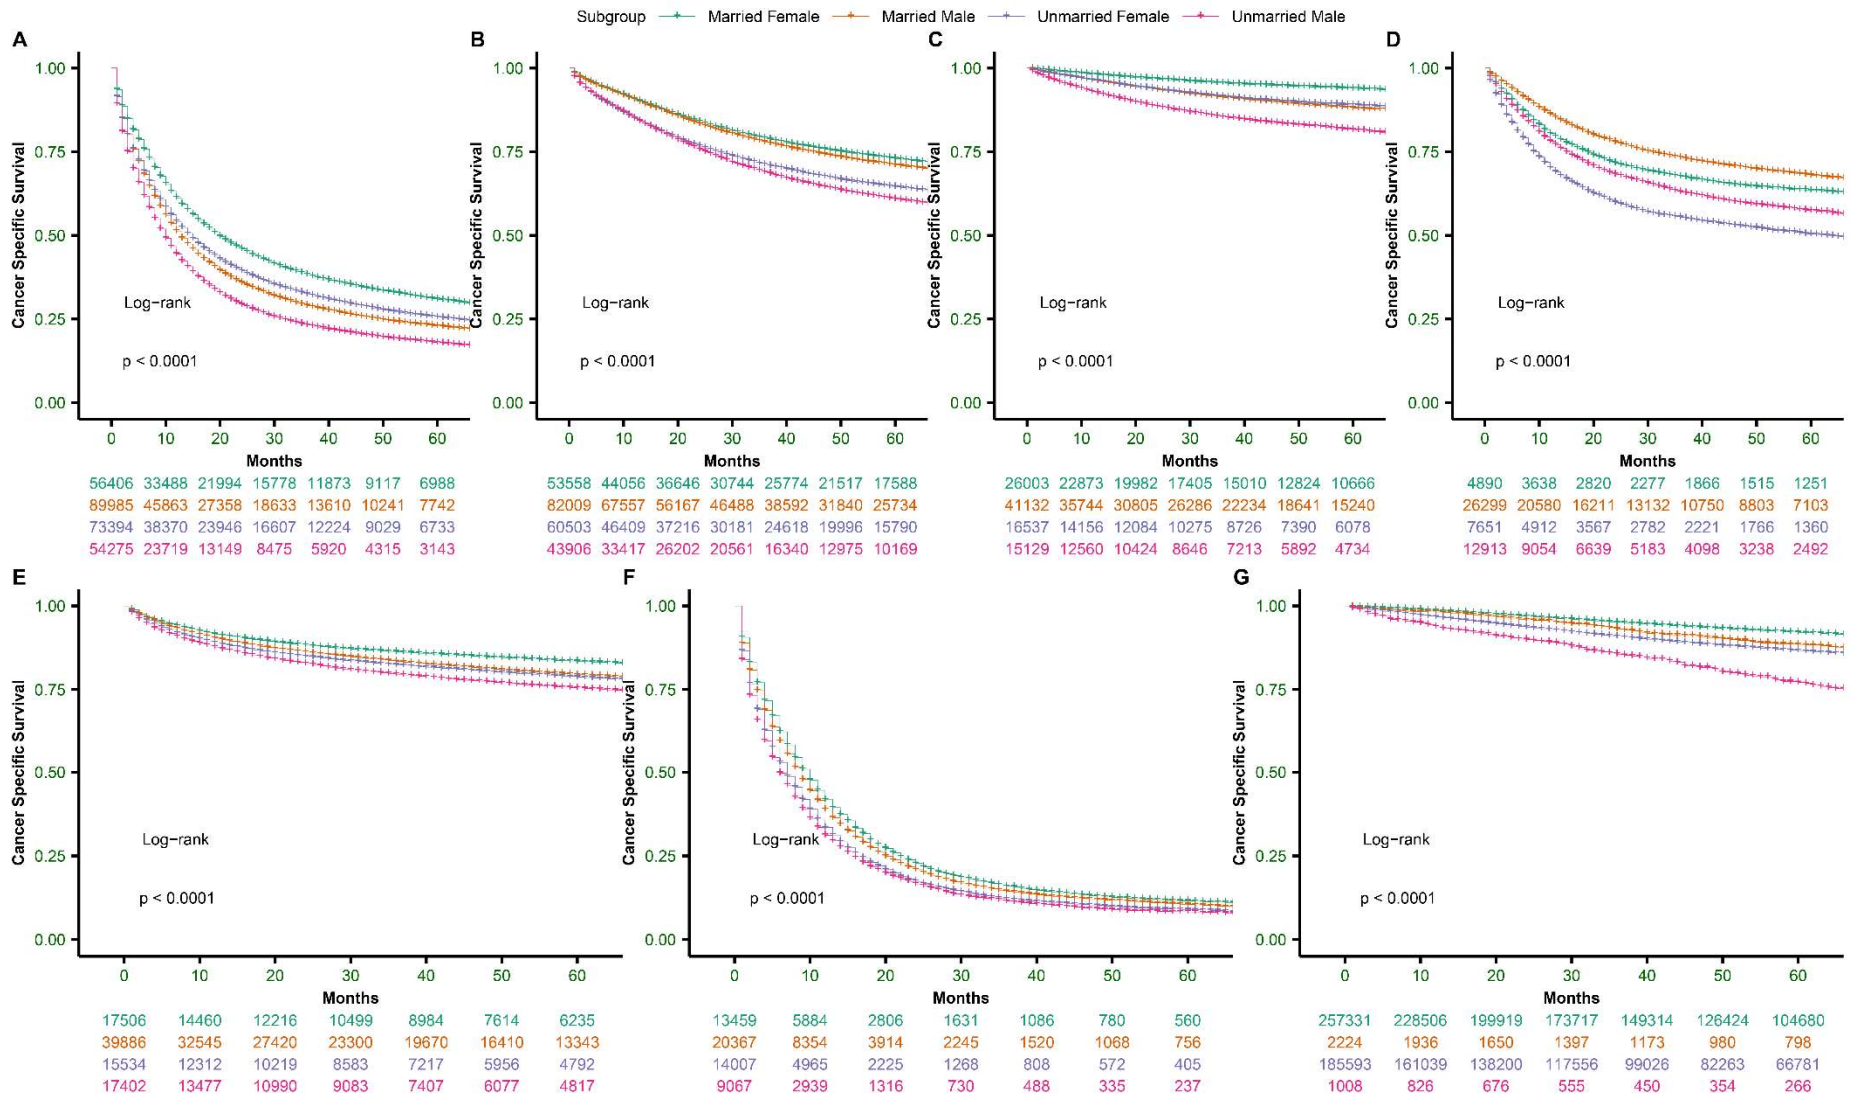

**eTable 2. Associations Between Cancer-Specific Survival and Marital Status (Married vs Unmarried), Stage at Diagnosis, and Treatment**

| Risk factors                    | Total Sample            |        | Breast                  |        | Lung                    |        | Prostate                |        |
|---------------------------------|-------------------------|--------|-------------------------|--------|-------------------------|--------|-------------------------|--------|
|                                 | TR <sup>e</sup> (95%CI) | P      | TR <sup>e</sup> (95%CI) | P      | TR <sup>e</sup> (95%CI) | P      | TR <sup>e</sup> (95%CI) | P      |
| <b>Stage<sup>a</sup></b>        |                         |        |                         |        |                         |        |                         |        |
| <b>Early</b>                    | Reference               |        | Reference               |        | Reference               |        | Reference               |        |
| <b>Advanced</b>                 | 0.051 (0.051, 0.052)    | <0.001 | 0.125 (0.122, 0.128)    | <0.001 | 0.158 (0.155, 0.161)    | <0.001 | 0.139 (0.134, 0.144)    | <0.001 |
| <b>Surgery<sup>b</sup></b>      |                         |        |                         |        |                         |        |                         |        |
| <b>No</b>                       | Reference               |        | Reference               |        | Reference               |        | Reference               |        |
| <b>Yes</b>                      | 3.442 (3.417, 3.467)    | <0.001 | 3.824 (3.729, 3.922)    | <0.001 | 4.735 (4.638, 4.834)    | <0.001 | 4.137 (3.979, 4.301)    | <0.001 |
| <b>Radiotherapy<sup>c</sup></b> |                         |        |                         |        |                         |        |                         |        |
| <b>No</b>                       | Reference               |        | Reference               |        | Reference               |        | Reference               |        |
| <b>Yes</b>                      | 1.446 (1.436, 1.456)    | <0.001 | 1.251 (1.226, 1.276)    | 0.015  | 1.277 (1.263, 1.291)    | <0.001 | 1.587 (1.539, 1.635)    | <0.001 |
| <b>Chemotherapy<sup>d</sup></b> |                         |        |                         |        |                         |        |                         |        |
| <b>No</b>                       | Reference               |        | Reference               |        | Reference               |        | Reference               |        |
| <b>Yes</b>                      | 0.727 (0.722, 0.733)    | <0.001 | 0.973 (0.952, 0.995)    | <0.001 | 1.837 (1.815, 1.86)     | <0.001 | 0.418 (0.396, 0.441)    | <0.001 |
|                                 | <b>Colorectum</b>       |        | <b>Melanoma</b>         |        | <b>Bladder</b>          |        | <b>Kidney</b>           |        |
|                                 | TR <sup>e</sup> (95%CI) | P      | TR <sup>e</sup> (95%CI) | P      | TR <sup>e</sup> (95%CI) | P      | TR <sup>e</sup> (95%CI) | P      |
|                                 |                         |        |                         |        |                         |        |                         |        |
| <b>Stage<sup>a</sup></b>        | Reference               |        | Reference               |        | Reference               |        | Reference               |        |
| <b>Early</b>                    | 0.100 (0.097, 0.103)    | <0.001 | 0.047 (0.044, 0.05)     | <0.001 | 0.138 (0.131, 0.144)    | <0.001 | 0.042 (0.039, 0.045)    | <0.001 |
| <b>Advanced</b>                 |                         |        |                         |        |                         |        |                         |        |
| <b>Surgery<sup>b</sup></b>      | Reference               |        | Reference               |        | Reference               |        | Reference               |        |
| <b>No</b>                       | 6.593 (6.447, 6.743)    | <0.001 | 2.263 (2.128, 2.408)    | <0.001 | 2.335 (2.16, 2.525)     | <0.001 | 6.976 (6.606, 7.367)    | <0.001 |
| <b>Yes</b>                      |                         |        |                         |        |                         |        |                         |        |
| <b>Radiotherapy<sup>c</sup></b> | Reference               |        | Reference               |        | Reference               |        | Reference               |        |
| <b>No</b>                       | 1.25 (1.22, 1.282)      | <0.001 | 0.461 (0.432, 0.492)    | <0.001 | 0.525 (0.497, 0.556)    | <0.001 | 0.591 (0.563, 0.62)     | <0.001 |
| <b>Yes</b>                      |                         |        |                         |        |                         |        |                         |        |
| <b>Chemotherapy<sup>d</sup></b> | Reference               |        | Reference               |        | Reference               |        | Reference               |        |
| <b>No</b>                       | 1.33 (1.302, 1.359)     | <0.001 | 0.485 (0.454, 0.518)    | <0.001 | 1.039 (0.994, 1.086)    | 0.094  | 0.662 (0.633, 0.692)    | <0.001 |
| <b>Yes</b>                      |                         |        |                         |        |                         |        |                         |        |

eTable 2 cont.

| Risk factors                    | Endometrium             |        | Pancreas                |        |
|---------------------------------|-------------------------|--------|-------------------------|--------|
|                                 | TR <sup>e</sup> (95%CI) | P      | TR <sup>e</sup> (95%CI) | P      |
| <b>Stage<sup>a</sup></b>        |                         |        |                         |        |
| <b>Early</b>                    | Reference               |        | Reference               |        |
| <b>Advanced</b>                 | 0.093 (0.088, 0.099)    | <0.001 | 0.384 (0.375, 0.393)    | <0.001 |
| <b>Surgery<sup>b</sup></b>      |                         |        |                         |        |
| <b>No</b>                       | Reference               |        | Reference               |        |
| <b>Yes</b>                      | 6.582 (6.225, 6.959)    | <0.001 | 3.156 (3.056, 3.259)    | <0.001 |
| <b>Radiotherapy<sup>c</sup></b> |                         |        |                         |        |
| <b>No</b>                       | Reference               |        | Reference               |        |
| <b>Yes</b>                      | 1.323 (1.266, 1.383)    | <0.001 | 1.152 (1.123, 1.182)    | <0.001 |
| <b>Chemotherapy<sup>d</sup></b> |                         |        |                         |        |
| <b>No</b>                       | Reference               |        | Reference               |        |
| <b>Yes</b>                      | 0.954 (0.907, 1.003)    | 0.068  | 1.548 (1.516, 1.581)    | <0.001 |

<sup>a</sup>After adjusted for age, race, marital status, sex, grade, residence, poverty level and educational level; <sup>b</sup>After adjusted for age, race, marital status, sex, grade, residence, poverty level, educational level, stage at diagnosis, radiotherapy, and chemotherapy; <sup>c</sup>After adjusted for age, race, marital status, sex, grade, residence, poverty level, educational level, stage at diagnosis, surgery, and chemotherapy; <sup>d</sup>After adjusted for age, race, marital status, sex, grade, residence, poverty level, educational level, stage at diagnosis, surgery, and radiotherapy; <sup>e</sup>Time ratio

**eTable 3. Associations Between Cancer-Specific Survival and Marital Status (Married vs Unmarried), Stage at Diagnosis, and Treatment by Cancer Site and Histological Subtype**

| Cancer and Sex           | CSS <sup>a</sup>                      |          | Diagnosed at an Advanced Stage        |          | Receiving Surgery                     |          | Receiving Chemotherapy                |          | Receiving RT <sup>f</sup>             |          |
|--------------------------|---------------------------------------|----------|---------------------------------------|----------|---------------------------------------|----------|---------------------------------------|----------|---------------------------------------|----------|
|                          | TR <sup>b</sup> for Marriage (95% CI) | <i>P</i> | OR <sup>c</sup> for Marriage (95% CI) | <i>P</i> | OR <sup>d</sup> for Marriage (95% CI) | <i>P</i> | OR <sup>e</sup> for Marriage (95% CI) | <i>P</i> | OR <sup>g</sup> for Marriage (95% CI) | <i>P</i> |
| <b>Lung</b>              |                                       |          |                                       |          |                                       |          |                                       |          |                                       |          |
| <b>SCLC<sup>h</sup></b>  | 1.072(1.046, 1.099)                   | <0.001   | 1.019(0.945, 1.100)                   | 0.621    | 1.374(1.197, 1.58)                    | <0.001   | 1.36(1.284, 1.441)                    | <0.001   | 1.127(1.076, 1.179)                   | <0.001   |
| <b>NSCLC<sup>i</sup></b> | 1.105(1.091, 1.118)                   | <0.001   | 1.003(0.983, 1.023)                   | 0.774    | 1.437(1.397, 1.477)                   | <0.001   | 1.478(1.45, 1.507)                    | <0.001   | 1.046(1.027, 1.066)                   | <0.001   |
| <b>Pancreas</b>          |                                       |          |                                       |          |                                       |          |                                       |          |                                       |          |
| <b>Adenocarcinoma</b>    | 1.088(1.067, 1.109)                   | <0.001   | 1.030(0.990, 1.072)                   | 0.147    | 1.292(1.212, 1.379)                   | <0.001   | 1.615(1.551, 1.682)                   | <0.001   | 1.025(0.975, 1.079)                   | 0.332    |
| <b>pNET<sup>j</sup></b>  | 1.340(1.154, 1.556)                   | <0.001   | 0.884(0.738, 1.058)                   | 0.180    | 1.253(0.984, 1.596)                   | 0.067    | 1.078(0.878, 1.324)                   | 0.472    | 1.111(0.804, 1.548)                   | 0.529    |
| <b>Breast</b>            |                                       |          |                                       |          |                                       |          |                                       |          |                                       |          |
| <b>Triple Negative</b>   | 1.090(1.023, 1.161)                   | 0.008    | 0.819(0.762, 0.879)                   | <0.001   | 1.255(1.112, 1.416)                   | <0.001   | 1.117(1.026, 1.217)                   | 0.011    | 1.072(1.01, 1.138)                    | 0.023    |
| <b>HER2 Enriched</b>     | 1.171(1.042, 1.316)                   | <0.001   | 0.779(0.708, 0.857)                   | <0.001   | 1.369(1.172, 1.599)                   | <0.001   | 0.986(0.87, 1.116)                    | 0.821    | 1.029(0.939, 1.127)                   | 0.544    |
| <b>Luminal A</b>         | 1.110(1.065, 1.157)                   | <0.001   | 0.835(0.806, 0.865)                   | <0.001   | 1.298(1.214, 1.387)                   | <0.001   | 1.1(1.069, 1.131)                     | <0.001   | 1.052(1.025, 1.078)                   | <0.001   |
| <b>Luminal B</b>         | 1.093(0.995, 1.201)                   | 0.041    | 0.865(0.808, 0.926)                   | <0.001   | 1.447(1.293, 1.62)                    | <0.001   | 1.118(1.037, 1.204)                   | 0.004    | 1.025(0.967, 1.086)                   | 0.409    |

<sup>a</sup>Cancer-specific survival; <sup>b</sup>Time ratio, adjusted for patient demographics (age, race, sex, insurance status, residence, poverty level and educational level), stage, grade, receiving surgery, receiving chemotherapy and receiving radiation therapy; <sup>c</sup>Odds ratio, adjusted for patient demographics, and grade; <sup>d</sup>adjusted for patient demographics, stage, grade, receiving chemotherapy and receiving radiation therapy; <sup>e</sup>adjusted for patient demographics, stage, grade, receiving surgery and receiving radiation therapy; <sup>f</sup>adjusted for patient demographics, stage, grade, receiving surgery and receiving radiation therapy; <sup>g</sup>adjusted for patient demographics, stage, grade, receiving chemotherapy and receiving surgery; <sup>h</sup>SCLC, small cell lung cancer; <sup>i</sup>NSCLC, non-small cell lung cancer; <sup>j</sup>pNET, pancreatic neuroendocrine tumor.

**eTable 4. Mediation Analyses of Direct and Indirect Effects of Marital Status on Cancer-Specific Survival Mediated by Stage at Diagnosis and Treatment and Receiving Radiation Therapy**

| Mediators           | Total Sample           |          | Breast                 |          | Lung                   |          | Prostate            |          |
|---------------------|------------------------|----------|------------------------|----------|------------------------|----------|---------------------|----------|
|                     | Effect size (95%CI)    | <i>P</i> | Effect size (95%CI)    | <i>P</i> | Effect size (95%CI)    | <i>P</i> | Effect size (95%CI) | <i>P</i> |
| <b>Stage</b>        |                        |          |                        |          |                        |          |                     |          |
| TE <sup>a</sup>     | 0.387 (0.378,0.396)    | <0.001   | 0.275 (0.253,0.296)    | <0.001   | 0.177 (0.163,0.191)    | <0.001   | 0.451 (0.421,0.48)  | <0.001   |
| NIE <sup>b</sup>    | 0.065 (0.063,0.067)    | <0.001   | 0.028 (0.026,0.03)     | <0.001   | -0.002 (-0.01,0.006)   | <0.001   | 0.013 (0.011,0.015) | <0.001   |
| NDE <sup>c</sup>    | 0.322 (0.313,0.331)    | <0.001   | 0.247 (0.226,0.268)    | <0.001   | 0.179 (0.167,0.191)    | <0.001   | 0.437 (0.408,0.467) | <0.001   |
| PM <sup>d</sup>     | 0.196 (0.195,0.197)    | <0.001   | 0.114 (0.112,0.116)    | <0.001   | -0.013 (-0.015, -0.01) | <0.001   | 0.036 (0.034,0.038) | <0.001   |
| <b>Surgery</b>      |                        |          |                        |          |                        |          |                     |          |
| TE                  | 0.341 (0.335,0.348)    | <0.001   | 0.191 (0.171,0.21)     | <0.001   | 0.19 (0.177,0.203)     | <0.001   | 0.474 (0.446,0.503) | <0.001   |
| NIE                 | 0.034 (0.033,0.036)    | <0.001   | 0.005 (0.004,0.006)    | <0.001   | 0.095 (0.087,0.102)    | <0.001   | 0.161 (0.153,0.168) | <0.001   |
| NDE                 | 0.307 (0.301,0.314)    | <0.001   | 0.186 (0.166,0.205)    | <0.001   | 0.096 (0.084,0.107)    | <0.001   | 0.314 (0.286,0.341) | <0.001   |
| PM                  | 0.117 (0.116,0.117)    | <0.001   | 0.029 (0.027,0.03)     | <0.001   | 0.522 (0.519,0.524)    | <0.001   | 0.393 (0.39,0.396)  | <0.001   |
| <b>Radiotherapy</b> |                        |          |                        |          |                        |          |                     |          |
| TE                  | 0.318 (0.312,0.325)    | <0.001   | 0.194 (0.175,0.214)    | <0.001   | 0.099 (0.088,0.11)     | <0.001   | 0.333 (0.305,0.361) | <0.001   |
| NIE                 | 0.011 (0.01,0.012)     | <0.001   | 0.009 (0.008,0.01)     | <0.001   | 0.004 (0.002,0.005)    | <0.001   | 0.019 (0.017,0.021) | <0.001   |
| NDE                 | 0.307 (0.301,0.314)    | <0.001   | 0.186 (0.166,0.205)    | <0.001   | 0.096 (0.084,0.107)    | <0.001   | 0.314 (0.286,0.341) | <0.001   |
| PM                  | 0.04 (0.04,0.041)      | <0.001   | 0.05 (0.048,0.051)     | <0.001   | 0.037 (0.036,0.038)    | <0.001   | 0.067 (0.065,0.069) | <0.001   |
| <b>Chemotherapy</b> |                        |          |                        |          |                        |          |                     |          |
| TE                  | 0.298 (0.292,0.305)    | <0.001   | 0.185 (0.165,0.204)    | <0.001   | 0.149 (0.138,0.161)    | <0.001   | 0.313 (0.286,0.341) | <0.001   |
| NIE                 | -0.009 (-0.009,-0.008) | <0.001   | -0.001 (-0.002,0)      | 0.016    | 0.054 (0.051,0.057)    | <0.001   | 0 (0,0)             | 0.051    |
| NDE                 | 0.307 (0.301,0.314)    | <0.001   | 0.186 (0.166,0.205)    | <0.001   | 0.096 (0.084,0.107)    | <0.001   | 0.314 (0.286,0.341) | <0.001   |
| PM                  | -0.034 (-0.035,-0.034) | <0.001   | -0.006 (-0.008,-0.004) | <0.001   | 0.377 (0.376,0.379)    | <0.001   | 0 (-0.002,0.002)    | 0.707    |



eTable 4 cont.

| Mediators              | Colorectum             |        | Melanoma              |        | Bladder             |        | Kidney                 |        |
|------------------------|------------------------|--------|-----------------------|--------|---------------------|--------|------------------------|--------|
|                        | Effect size (95%CI)    | P      | Effect size (95%CI)   | P      | Effect size (95%CI) | P      | Effect size (95%CI)    | P      |
| <b>Stage</b>           |                        |        |                       |        |                     |        |                        |        |
| <b>TE<sup>a</sup></b>  | 0.351 (0.329,0.372)    | <0.001 | 0.386 (0.336,0.437)   | <0.001 | 0.442 (0.398,0.486) | <0.001 | 0.248 (0.204,0.292)    | <0.001 |
| <b>NIE<sup>b</sup></b> | 0.033 (0.026,0.04)     | <0.001 | 0.039 (0.034,0.044)   | <0.001 | 0.029 (0.02,0.037)  | <0.001 | 0.019 (0.01,0.027)     | <0.001 |
| <b>NDE<sup>c</sup></b> | 0.318 (0.298,0.338)    | <0.001 | 0.347 (0.297,0.397)   | <0.001 | 0.413 (0.37,0.456)  | <0.001 | 0.229 (0.186,0.273)    | <0.001 |
| <b>PM<sup>d</sup></b>  | 0.109 (0.107,0.112)    | <0.001 | 0.12 (0.117,0.124)    | <0.001 | 0.079 (0.075,0.082) | <0.001 | 0.085 (0.081,0.09)     | <0.001 |
| <b>Surgery</b>         |                        |        |                       |        |                     |        |                        |        |
| <b>TE</b>              | 0.244 (0.226,0.263)    | <0.001 | 0.338 (0.29,0.385)    | <0.001 | 0.389 (0.347,0.432) | <0.001 | 0.159 (0.122,0.197)    | <0.001 |
| <b>NIE</b>             | 0.02 (0.018,0.021)     | <0.001 | 0 (0,0.001)           | 0.269  | 0.003 (0.002,0.005) | <0.001 | 0.011 (0.01,0.013)     | <0.001 |
| <b>NDE</b>             | 0.225 (0.207,0.243)    | <0.001 | 0.337 (0.29,0.385)    | <0.001 | 0.386 (0.344,0.429) | <0.001 | 0.148 (0.111,0.185)    | <0.001 |
| <b>PM</b>              | 0.09 (0.088,0.091)     | <0.001 | 0.001 (-0.002,0.005)  | 0.387  | 0.009 (0.007,0.012) | <0.001 | 0.076 (0.072,0.079)    | <0.001 |
| <b>Radiotherapy</b>    |                        |        |                       |        |                     |        |                        |        |
| <b>TE</b>              | 0.223 (0.205,0.242)    | <0.001 | 0.338 (0.29,0.385)    | <0.001 | 0.395 (0.353,0.437) | <0.001 | 0.148 (0.111,0.185)    | <0.001 |
| <b>NIE</b>             | -0.002 (-0.002,-0.001) | 0.004  | 0 (0,0.001)           | 0.12   | 0.009 (0.006,0.011) | <0.001 | 0 (0,0)                | <0.001 |
| <b>NDE</b>             | 0.225 (0.207,0.243)    | <0.001 | 0.337 (0.29,0.385)    | <0.001 | 0.386 (0.344,0.429) | <0.001 | 0.148 (0.111,0.185)    | <0.001 |
| <b>PM</b>              | -0.008 (-0.009,-0.006) | <0.001 | 0.001 (-0.002,0.004)  | 0.474  | 0.026 (0.024,0.029) | <0.001 | 0 (-0.004,0.003)       | <0.001 |
| <b>Chemotherapy</b>    |                        |        |                       |        |                     |        |                        |        |
| <b>TE</b>              | 0.245 (0.227,0.264)    | <0.001 | 0.337 (0.29,0.385)    | <0.001 | 0.388 (0.345,0.43)  | <0.001 | 0.146 (0.108,0.183)    | <0.001 |
| <b>NIE</b>             | 0.021 (0.018,0.023)    | <0.001 | 0 (0,0)               | 0.309  | 0.002 (0,0.003)     | 0.102  | -0.002 (-0.003,-0.002) | <0.001 |
| <b>NDE</b>             | 0.225 (0.207,0.243)    | <0.001 | 0.337 (0.29,0.385)    | <0.001 | 0.386 (0.344,0.429) | <0.001 | 0.148 (0.111,0.185)    | <0.001 |
| <b>PM</b>              | 0.094 (0.092,0.095)    | <0.001 | -0.001 (-0.004,0.003) | 0.762  | 0.005 (0.002,0.008) | 0.001  | -0.015 (-0.019,-0.012) | <0.001 |

eTable 4 cont.

| Mediators              | Endometrium           |        | Pancreas              |        |
|------------------------|-----------------------|--------|-----------------------|--------|
|                        | Effect size (95%CI)   | P      | Effect size (95%CI)   | P      |
| <b>Stage</b>           |                       |        |                       |        |
| <b>TE<sup>a</sup></b>  | 0.274 (0.226,0.322)   | <0.001 | 0.166 (0.143,0.189)   | <0.001 |
| <b>NIE<sup>b</sup></b> | 0.031 (0.026,0.037)   | <0.001 | -0.006 (-0.015,0.004) | <0.001 |
| <b>NDE<sup>c</sup></b> | 0.243 (0.195,0.29)    | <0.001 | 0.172 (0.15,0.193)    | <0.001 |
| <b>PM<sup>d</sup></b>  | 0.129 (0.125,0.133)   | <0.001 | -0.037 (-0.04,-0.033) | <0.001 |
| <b>Surgery</b>         |                       |        |                       |        |
| <b>TE</b>              | 0.173 (0.13,0.217)    | <0.001 | 0.153 (0.131,0.176)   | <0.001 |
| <b>NIE</b>             | 0.014 (0.012,0.016)   | <0.001 | 0.042 (0.032,0.052)   | <0.001 |
| <b>NDE</b>             | 0.16 (0.116,0.203)    | <0.001 | 0.111 (0.091,0.131)   | <0.001 |
| <b>PM</b>              | 0.086 (0.082,0.09)    | <0.001 | 0.289 (0.286,0.293)   | <0.001 |
| <b>Radiotherapy</b>    |                       |        |                       |        |
| <b>TE</b>              | 0.16 (0.116,0.203)    | <0.001 | 0.112 (0.091,0.132)   | <0.001 |
| <b>NIE</b>             | 0 (-0.002,0.002)      | <0.001 | 0 (0,0.001)           | 0.392  |
| <b>NDE</b>             | 0.16 (0.116,0.203)    | <0.001 | 0.111 (0.091,0.131)   | <0.001 |
| <b>PM</b>              | -0.001 (-0.005,0.003) | <0.001 | 0.004 (0.002,0.006)   | <0.001 |
| <b>Chemotherapy</b>    |                       |        |                       |        |
| <b>TE</b>              | 0.159 (0.115,0.203)   | <0.001 | 0.153 (0.132,0.173)   | <0.001 |
| <b>NIE</b>             | -0.001 (-0.001,0)     | 0.076  | 0.041 (0.037,0.045)   | <0.001 |
| <b>NDE</b>             | 0.16 (0.116,0.203)    | <0.001 | 0.111 (0.091,0.131)   | <0.001 |
| <b>PM</b>              | -0.004 (-0.008,0)     | 0.059  | 0.286 (0.284,0.289)   | <0.001 |

<sup>a</sup>Total effect; <sup>b</sup>Natural indirect effect; <sup>c</sup>Natural direct effect; <sup>d</sup>Proportion mediated

**eTable 5. Mediation Analyses of Direct and Indirect Effects of Marital Status on Cancer-Specific Survival Mediated by Stage at Diagnosis and Treatment by**

**Histological Subtype**

| Mediators              | Lung                  |          |                        |          | Pancreas               |          |                        |          |
|------------------------|-----------------------|----------|------------------------|----------|------------------------|----------|------------------------|----------|
|                        | NSCLC <sup>e</sup>    |          | SCLC <sup>f</sup>      |          | Adenocarcinoma         |          | pNET <sup>g</sup>      |          |
|                        | Effect size (95%CI)   | <i>P</i> | Effect size (95%CI)    | <i>P</i> | Effect size (95%CI)    | <i>P</i> | Effect size (95%CI)    | <i>P</i> |
| <b>Stage</b>           |                       |          |                        |          |                        |          |                        |          |
| <b>TE<sup>a</sup></b>  | 0.191 (0.175,0.207)   | <0.001   | 0.107 (0.078,0.135)    | <0.001   | 0.156 (0.133,0.178)    | <0.001   | 0.359 (0.189,0.53)     | <0.001   |
| <b>NIE<sup>b</sup></b> | -0.001 (-0.01,0.007)  | 0.774    | -0.003 (-0.014,0.009)  | 0.621    | -0.007 (-0.016,0.002)  | 0.147    | 0.052 (-0.024,0.127)   | 0.183    |
| <b>NDE<sup>c</sup></b> | 0.193 (0.179,0.206)   | <0.001   | 0.11 (0.083,0.136)     | <0.001   | 0.163 (0.142,0.183)    | <0.001   | 0.308 (0.155,0.461)    | <0.001   |
| <b>PM<sup>d</sup></b>  | -0.007 (-0.01,-0.004) | <0.001   | -0.029 (-0.033,-0.024) | <0.001   | -0.048 (-0.051,-0.044) | <0.001   | 0.166 (0.14,0.192)     | <0.001   |
| <b>Surgery</b>         |                       |          |                        |          |                        |          |                        |          |
| <b>TE</b>              | 0.208 (0.193,0.222)   | <0.001   | 0.077 (0.052,0.102)    | <0.001   | 0.118 (0.096,0.139)    | <0.001   | 0.351 (0.189,0.514)    | <0.001   |
| <b>NIE</b>             | 0.108 (0.1,0.116)     | <0.001   | 0.007 (0.002,0.012)    | 0.004    | 0.034 (0.025,0.042)    | <0.001   | 0.059 (-0.005,0.122)   | 0.073    |
| <b>NDE</b>             | 0.1 (0.087,0.112)     | <0.001   | 0.07 (0.045,0.094)     | <0.001   | 0.084 (0.064,0.103)    | <0.001   | 0.293 (0.143,0.442)    | <0.001   |
| <b>PM</b>              | 0.546 (0.543,0.549)   | <0.001   | 0.096 (0.093,0.099)    | <0.001   | 0.299 (0.296,0.302)    | <0.001   | 0.192 (0.169,0.214)    | <0.001   |
| <b>Radiotherapy</b>    |                       |          |                        |          |                        |          |                        |          |
| <b>TE</b>              | 0.102 (0.089,0.114)   | <0.001   | 0.086 (0.06,0.111)     | <0.001   | 0.084 (0.065,0.104)    | <0.001   | 0.292 (0.143,0.441)    | <0.001   |
| <b>NIE</b>             | 0.002 (0.001,0.003)   | <0.001   | 0.016 (0.01,0.022)     | <0.001   | 0.001 (-0.001,0.002)   | 0.330    | -0.001 (-0.003,0.002)  | 0.666    |
| <b>NDE</b>             | 0.1 (0.087,0.112)     | <0.001   | 0.07 (0.045,0.094)     | <0.001   | 0.084 (0.064,0.103)    | <0.001   | 0.293 (0.143,0.442)    | <0.001   |
| <b>PM</b>              | 0.02 (0.019,0.022)    | <0.001   | 0.19 (0.187,0.193)     | <0.001   | 0.007 (0.005,0.009)    | 0.036    | -0.002 (-0.014,0.009)) | 0.669    |
| <b>Chemotherapy</b>    |                       |          |                        |          |                        |          |                        |          |
| <b>TE</b>              | 0.159 (0.146,0.171)   | <0.001   | 0.094 (0.069,0.119)    | <0.001   | 0.139 (0.119,0.159)    | <0.001   | 0.291 (0.141,0.44)     | <0.001   |
| <b>NIE</b>             | 0.059 (0.056,0.062)   | <0.001   | 0.024 (0.019,0.029)    | <0.001   | 0.055 (0.05,0.06)      | <0.001   | -0.002 (-0.007,0.003)  | 0.496    |
| <b>NDE</b>             | 0.1 (0.087,0.112)     | <0.001   | 0.07 (0.045,0.094)     | <0.001   | 0.084 (0.064,0.103)    | <0.001   | 0.293 (0.143,0.442)    | <0.001   |
| <b>PM</b>              | 0.391 (0.389,0.392)   | <0.001   | 0.265 (0.262,0.268)    | <0.001   | 0.411 (0.409,0.413)    | <0.001   | -0.007 (-0.018,0.004)  | 0.219    |

<sup>a</sup>Total effect; <sup>b</sup>Natural indirect effect; <sup>c</sup>Natural direct effect; <sup>d</sup>Proportion mediated; <sup>e</sup>NSCLC, non-small cell lung cancer; <sup>f</sup>SCLC, small cell lung cancer; <sup>g</sup>pNET, pancreatic neuroendocrine tumor.

eTable 5 cont.

| Mediators              | Breast              |          |                       |          |                        |          |                      |          |
|------------------------|---------------------|----------|-----------------------|----------|------------------------|----------|----------------------|----------|
|                        | Triple Negative     |          | HER2 Enriched         |          | Luminal A              |          | Luminal B            |          |
|                        | Effect size (95%CI) | <i>P</i> | Effect size (95%CI)   | <i>P</i> | Effect size (95%CI)    | <i>P</i> | Effect size (95%CI)  | <i>P</i> |
| <b>Stage</b>           |                     |          |                       |          |                        |          |                      |          |
| <b>TE<sup>a</sup></b>  | 0.163 (0.094,0.231) | <0.001   | 0.272 (0.145,0.399)   | 0.002    | 0.181 (0.136,0.225)    | <0.001   | 0.232 (0.132,0.333)  | <0.001   |
| <b>NIE<sup>b</sup></b> | 0.032 (0.02,0.044)  | <0.001   | 0.054 (0.032,0.075)   | <0.001   | 0.018 (0.014,0.022)    | <0.001   | 0.025 (0.013,0.036)  | <0.001   |
| <b>NDE<sup>c</sup></b> | 0.131 (0.063,0.198) | <0.001   | 0.219 (0.094,0.344)   | 0.008    | 0.163 (0.118,0.207)    | <0.001   | 0.208 (0.108,0.307)  | <0.001   |
| <b>PM<sup>d</sup></b>  | 0.21 (0.202,0.217)  | <0.001   | 0.219 (0.207,0.231)   | <0.001   | 0.108 (0.103,0.112)    | <0.001   | 0.117 (0.108,0.126)  | <0.001   |
| <b>Surgery</b>         |                     |          |                       |          |                        |          |                      |          |
| <b>TE</b>              | 0.091 (0.028,0.155) | <0.001   | 0.169 (0.052,0.286)   | 0.004    | 0.107 (0.066,0.148)    | <0.001   | 0.098 (0.004,0.193)  | 0.040    |
| <b>NIE</b>             | 0.005 (0.002,0.008) | <0.001   | 0.012 (0.003,0.02)    | 0.007    | 0.003 (0.002,0.003)    | <0.001   | 0.009 (0.006,0.012)  | <0.001   |
| <b>NDE</b>             | 0.086 (0.022,0.149) | 0.007    | 0.158 (0.041,0.274)   | 0.008    | 0.104 (0.063,0.146)    | <0.001   | 0.089 (-0.005,0.183) | 0.063    |
| <b>PM</b>              | 0.06 (0.053,0.066)  | <0.001   | 0.074 (0.063,0.085)   | <0.001   | 0.026 (0.022,0.03)     | <0.001   | 0.1 (0.09,0.109)     | 0.136    |
| <b>Radiotherapy</b>    |                     |          |                       |          |                        |          |                      |          |
| <b>TE</b>              | 0.089 (0.025,0.152) | 0.006    | 0.157 (0.04,0.274)    | 0.008    | 0.106 (0.064,0.147)    | <0.001   | 0.09 (-0.004,0.184)  | 0.061    |
| <b>NIE</b>             | 0.003 (0,0.006)     | 0.039    | -0.001 (-0.002,0.001) | 0.592    | 0.001 (0,0.002)        | 0.003    | 0.001 (-0.001,0.002) | 0.437    |
| <b>NDE</b>             | 0.086 (0.022,0.149) | <0.001   | 0.158 (0.041,0.274)   | 0.008    | 0.104 (0.063,0.146)    | <0.001   | 0.089 (-0.005,0.183) | 0.063    |
| <b>PM</b>              | 0.033 (0.027,0.04)  | 0.008    | -0.003 (-0.014,0.007) | 0.529    | 0.012 (0.007,0.016)    | 0.745    | 0.008 (-0.002,0.018) | 0.101    |
| <b>Chemotherapy</b>    |                     |          |                       |          |                        |          |                      |          |
| <b>TE</b>              | 0.087 (0.023,0.15)  | 0.007    | 0.157 (0.04,0.274)    | 0.009    | 0.103 (0.061,0.144)    | <0.001   | 0.096 (0.001,0.19)   | 0.047    |
| <b>NIE</b>             | 0.001 (0,0.002)     | 0.177    | -0.001 (-0.006,0.005) | 0.822    | -0.002 (-0.003,-0.001) | 0.002    | 0.007 (0.002,0.011)  | 0.005    |
| <b>NDE</b>             | 0.086 (0.022,0.149) | 0.008    | 0.158 (0.041,0.274)   | 0.008    | 0.104 (0.063,0.146)    | <0.001   | 0.089 (-0.005,0.183) | 0.063    |
| <b>PM</b>              | 0.01 (0.003,0.016)  | 0.003    | -0.004 (-0.015,0.007) | 0.449    | -0.019 (-0.023,-0.015) | <0.001   | 0.072 (0.062,0.081)  | <0.001   |

**eTable 6. Mediation Analyses of Direct and Indirect Effects of Marital Status on Cancer-Specific Survival Mediated by Stage at Diagnosis and Treatment by Sex**

| Mediators              | Total Sample           |          |                        |          | Lung                          |          |                          |          | Colorectum             |          |                        |          |
|------------------------|------------------------|----------|------------------------|----------|-------------------------------|----------|--------------------------|----------|------------------------|----------|------------------------|----------|
|                        | Female                 |          | Male                   |          | Female                        |          | Male                     |          | Female                 |          | Male                   |          |
|                        | Effect size<br>(95%CI) | <i>P</i> | Effect size<br>(95%CI) | <i>P</i> | Effect size<br>(95%CI)        | <i>P</i> | Effect size<br>(95%CI)   | <i>P</i> | Effect size<br>(95%CI) | <i>P</i> | Effect size<br>(95%CI) | <i>P</i> |
| <b>Stage</b>           |                        |          |                        |          |                               |          |                          |          |                        |          |                        |          |
| <b>TE<sup>a</sup></b>  | 0.261<br>(0.248,0.274) | <0.001   | 0.372<br>(0.358,0.386) | <0.001   | 0.129<br>(0.107,0.15)         | <0.001   | 0.21<br>(0.19,0.229)     | <0.001   | 0.261<br>(0.231,0.291) | <0.001   | 0.405<br>(0.377,0.434) | <0.001   |
| <b>NIE<sup>b</sup></b> | 0.048<br>(0.045,0.051) | <0.001   | 0.07<br>(0.064,0.075)  | <0.001   | -0.01<br>(-0.022,0.002)       | 0.001    | -0.001 (-<br>0.012,0.01) | <0.001   | 0.061<br>(0.05,0.072)  | <0.001   | 0.035<br>(0.025,0.044) | <0.001   |
| <b>NDE<sup>c</sup></b> | 0.213<br>(0.201,0.226) | <0.001   | 0.302<br>(0.29,0.315)  | <0.001   | 0.139<br>(0.121,0.157)        | <0.001   | 0.211<br>(0.195,0.227)   | <0.001   | 0.2<br>(0.172,0.228)   | <0.001   | 0.371<br>(0.343,0.398) | <0.001   |
| <b>PM<sup>d</sup></b>  | 0.203<br>(0.202,0.204) | <0.001   | 0.217<br>(0.215,0.219) | <0.001   | -0.084<br>(-0.089, -<br>0.08) | <0.001   | -0.006<br>(-0.01,-0.002) | <0.001   | 0.257<br>(0.253,0.261) | <0.001   | 0.103<br>(0.099,0.106) | <0.001   |
| <b>Surgery</b>         |                        |          |                        |          |                               |          |                          |          |                        |          |                        |          |
| <b>TE</b>              | 0.203<br>(0.194,0.213) | <0.001   | 0.308<br>(0.297,0.318) | <0.001   | 0.161<br>(0.141,0.182)        | <0.001   | 0.211<br>(0.194,0.229)   | <0.001   | 0.21<br>(0.182,0.239)  | <0.001   | 0.278<br>(0.254,0.303) | <0.001   |
| <b>NIE</b>             | 0.021<br>(0.019,0.022) | <0.001   | 0.073<br>(0.069,0.077) | <0.001   | 0.085<br>(0.073,0.097)        | <0.001   | 0.096<br>(0.088,0.105)   | <0.001   | 0.01<br>(0.008,0.013)  | <0.001   | 0.029<br>(0.026,0.032) | <0.001   |
| <b>NDE</b>             | 0.183<br>(0.173,0.192) | <0.001   | 0.235<br>(0.225,0.244) | <0.001   | 0.076<br>(0.059,0.093)        | <0.001   | 0.115<br>(0.1,0.13)      | <0.001   | 0.2<br>(0.172,0.228)   | <0.001   | 0.249<br>(0.225,0.274) | <0.001   |
| <b>PM</b>              | 0.111<br>(0.11,0.112)  | <0.001   | 0.266<br>(0.264,0.267) | <0.001   | 0.547<br>(0.544,0.551)        | <0.001   | 0.483<br>(0.48,0.485)    | <0.001   | 0.054<br>(0.051,0.056) | <0.001   | 0.117<br>(0.115,0.119) | <0.001   |

eTable 6 cont.

| Mediators           | Total Sample           |          |                            |          | Lung                   |          |                        |          | Colorectum                    |          |                               |          |
|---------------------|------------------------|----------|----------------------------|----------|------------------------|----------|------------------------|----------|-------------------------------|----------|-------------------------------|----------|
|                     | Female                 |          | Male                       |          | Female                 |          | Male                   |          | Female                        |          | Male                          |          |
|                     | Effect size<br>(95%CI) | <i>P</i> | Effect size<br>(95%CI)     | <i>P</i> | Effect size<br>(95%CI) | <i>P</i> | Effect size<br>(95%CI) | <i>P</i> | Effect size<br>(95%CI)        | <i>P</i> | Effect size<br>(95%CI)        | <i>P</i> |
| <b>Radiotherapy</b> |                        |          |                            |          |                        |          |                        |          |                               |          |                               |          |
| <b>TE</b>           | 0.193<br>(0.184,0.203) | <0.001   | 0.233<br>(0.223,0.242)     | <0.001   | 0.079<br>(0.062,0.096) | <0.001   | 0.119<br>(0.103,0.134) | <0.001   | 0.199<br>(0.171,0.227)        | <0.001   | 0.247<br>(0.223,0.272)        | <0.001   |
| <b>NIE</b>          | 0.01<br>(0.01,0.011)   | <0.001   | -0.002 (-<br>0.003,-0.002) | <0.001   | 0.003<br>(0.001,0.004) | <0.001   | 0.004<br>(0.002,0.005) | <0.001   | -0.001<br>(-0.002,0)          | <0.001   | -0.002<br>(-0.003,-<br>0.001) | <0.001   |
| <b>NDE</b>          | 0.183<br>(0.173,0.192) | <0.001   | 0.235<br>(0.225,0.244)     | <0.001   | 0.076<br>(0.059,0.093) | <0.001   | 0.115<br>(0.1,0.13)    | <0.001   | 0.2<br>(0.172,0.228)          | <0.001   | 0.249<br>(0.225,0.274)        | <0.001   |
| <b>PM</b>           | 0.059<br>(0.058,0.06)  | <0.001   | -0.01 (-0.011,-<br>0.009)  | <0.001   | 0.038<br>(0.037,0.04)  | <0.001   | 0.033<br>(0.032,0.035) | <0.001   | -0.006<br>(-0.008,-<br>0.003) | <0.001   | -0.01<br>(-0.012,-<br>0.008)  | <0.001   |
| <b>Chemotherapy</b> |                        |          |                            |          |                        |          |                        |          |                               |          |                               |          |
| <b>TE</b>           | 0.192<br>(0.182,0.201) | <0.001   | 0.25<br>(0.24,0.26)        | <0.001   | 0.117<br>(0.1,0.134)   | <0.001   | 0.178<br>(0.163,0.194) | <0.001   | 0.219<br>(0.191,0.248)        | <0.001   | 0.269<br>(0.245,0.294)        | <0.001   |
| <b>NIE</b>          | 0.009<br>(0.008,0.01)  | <0.001   | 0.015<br>(0.014,0.016)     | <0.001   | 0.041<br>(0.037,0.045) | <0.001   | 0.063<br>(0.059,0.067) | <0.001   | 0.019<br>(0.016,0.022)        | <0.001   | 0.02<br>(0.017,0.023)         | <0.001   |
| <b>NDE</b>          | 0.183<br>(0.173,0.192) | <0.001   | 0.235<br>(0.225,0.244)     | <0.001   | 0.076<br>(0.059,0.093) | <0.001   | 0.115<br>(0.1,0.13)    | <0.001   | 0.2<br>(0.172,0.228)          | <0.001   | 0.249<br>(0.225,0.274)        | <0.001   |
| <b>PM</b>           | 0.051<br>(0.05,0.052)  | <0.001   | 0.068<br>(0.067,0.068)     | <0.001   | 0.363<br>(0.361,0.365) | <0.001   | 0.375<br>(0.373,0.377) | <0.001   | 0.096<br>(0.093,0.099)        | <0.001   | 0.083<br>(0.081,0.086)        | <0.001   |

eTable 6 cont.

| Mediators              | Melanoma                 |          |                         |          | Bladder                 |          |                        |          | Kidney                      |          |                        |          |
|------------------------|--------------------------|----------|-------------------------|----------|-------------------------|----------|------------------------|----------|-----------------------------|----------|------------------------|----------|
|                        | Female                   |          | Male                    |          | Female                  |          | Male                   |          | Female                      |          | Male                   |          |
|                        | Effect size<br>(95%CI)   | <i>P</i> | Effect size<br>(95%CI)  | <i>P</i> | Effect size<br>(95%CI)  | <i>P</i> | Effect size<br>(95%CI) | <i>P</i> | Effect size<br>(95%CI)      | <i>P</i> | Effect size<br>(95%CI) | <i>P</i> |
| <b>Stage</b>           |                          |          |                         |          |                         |          |                        |          |                             |          |                        |          |
| <b>TE<sup>a</sup></b>  | 0.313<br>(0.224,0.402)   | <0.001   | 0.409<br>(0.347,0.471)  | <0.001   | 0.373<br>(0.281,0.464)  | <0.001   | 0.469<br>(0.419,0.518) | <0.001   | 0.117<br>(0.042,0.192<br>)  | <0.001   | 0.294<br>(0.24,0.349)  | <0.001   |
| <b>NIE<sup>b</sup></b> | 0.023<br>(0.017,0.029)   | <0.001   | 0.05<br>(0.042,0.057)   | <0.001   | 0.009<br>(-0.009,0.028) | 0.281    | 0.038<br>(0.029,0.048) | <0.001   | 0.006<br>(-<br>0.005,0.018) | <0.001   | 0.025<br>(0.013,0.036) | 0.115    |
| <b>NDE<sup>c</sup></b> | 0.29<br>(0.201,0.379)    | <0.001   | 0.359<br>(0.298,0.421)  | <0.001   | 0.363<br>(0.274,0.453)  | <0.001   | 0.431<br>(0.382,0.479) |          | 0.111<br>(0.036,0.185<br>)  | <0.001   | 0.27<br>(0.216,0.323)  | <0.001   |
| <b>PM<sup>d</sup></b>  | 0.084<br>(0.077,0.091)   | <0.001   | 0.144<br>(0.139,0.149)  | <0.001   | 0.03<br>(0.022,0.039)   | <0.001   | 0.1<br>(0.096,0.105)   | <0.001   | 0.057<br>(0.049,0.065<br>)  | <0.001   | 0.095<br>(0.09,0.101)  | <0.001   |
| <b>Surgery</b>         |                          |          |                         |          |                         |          |                        |          |                             |          |                        |          |
| <b>TE</b>              | 0.299<br>(0.215,0.383)   | <0.001   | 0.35<br>(0.292,0.408)   | <0.001   | 0.341<br>(0.253,0.429)  | <0.001   | 0.405<br>(0.358,0.453) | <0.001   | 0.173<br>(0.13,0.217)       | <0.001   | 0.177<br>(0.13,0.224)  | <0.001   |
| <b>NIE</b>             | 0<br>(-0.001,0.001)      | 0.604    | 0.001 (0,0.002)         | 0.103    | 0.003<br>(-0.001,0.006) | 0.147    | 0.003<br>(0.001,0.005) | <0.001   | 0.014<br>(0.012,0.016<br>)  | <0.001   | 0.014<br>(0.012,0.017) | <0.001   |
| <b>NDE</b>             | 0.299<br>(0.215,0.383)   | <0.001   | 0.349<br>(0.291,0.407)  | <0.001   | 0.338<br>(0.25,0.426)   | <0.001   | 0.402<br>(0.354,0.45)  | <0.001   | 0.16<br>(0.116,0.203<br>)   | <0.001   | 0.162<br>(0.116,0.209) | <0.001   |
| <b>PM</b>              | -0.001<br>(-0.007,0.005) | 0.736    | 0.003<br>(-0.001,0.007) | 0.136    | 0.009<br>(0.003,0.016)  | 0.003    | 0.009<br>(0.006,0.012) | <0.001   | 0.086<br>(0.082,0.09)       | <0.001   | 0.088<br>(0.084,0.093) | <0.001   |

eTable 6 cont.

| Mediators           | Melanoma                 |          |                         |          | Bladder                |          |                         |          | Kidney                   |          |                           |          |
|---------------------|--------------------------|----------|-------------------------|----------|------------------------|----------|-------------------------|----------|--------------------------|----------|---------------------------|----------|
|                     | Female                   |          | Male                    |          | Female                 |          | Male                    |          | Female                   |          | Male                      |          |
|                     | Effect size<br>(95%CI)   | <i>P</i> | Effect size<br>(95%CI)  | <i>P</i> | Effect size<br>(95%CI) | <i>P</i> | Effect size<br>(95%CI)  | <i>P</i> | Effect size<br>(95%CI)   | <i>P</i> | Effect size<br>(95%CI)    | <i>P</i> |
| <b>Radiotherapy</b> |                          |          |                         |          |                        |          |                         |          |                          |          |                           |          |
| <b>TE</b>           | 0.299<br>(0.215,0.383)   | <0.001   | 0.349<br>(0.291,0.408)  | <0.001   | 0.347<br>(0.259,0.435) | <0.001   | 0.411<br>(0.363,0.459)  | <0.001   | 0.16<br>(0.116,0.203)    | <0.001   | 0.162<br>(0.116,0.209)    | <0.001   |
| <b>NIE</b>          | 0<br>(-0.002,0.002)      | 0.81     | 0 (0,0.001)             | 0.296    | 0.009<br>(0.004,0.014) | <0.001   | 0.009<br>(0.006,0.011)  | <0.001   | 0<br>(-0.002,0.002)      | <0.001   | 0 (0,0)                   | 0.487    |
| <b>NDE</b>          | 0.299<br>(0.215,0.383)   | <0.001   | 0.349<br>(0.291,0.407)  | <0.001   | 0.338<br>(0.25,0.426)  | <0.001   | 0.402<br>(0.354,0.45)   | <0.001   | 0.16<br>(0.116,0.203)    | <0.001   | 0.162<br>(0.116,0.209)    | <0.001   |
| <b>PM</b>           | 0.001<br>(-0.005,0.007)  | 0.745    | 0.001<br>(-0.003,0.005) | 0.528    | 0.031<br>(0.024,0.037) | <0.001   | 0.026<br>(0.023,0.029)  | <0.001   | -0.001<br>(-0.005,0.003) | <0.001   | -0.001<br>(-0.005,0.003)  | 0.695    |
| <b>Chemotherapy</b> |                          |          |                         |          |                        |          |                         |          |                          |          |                           |          |
| <b>TE</b>           | 0.299<br>(0.215,0.383)   | <0.001   | 0.349<br>(0.291,0.407)  | <0.001   | 0.343<br>(0.255,0.431) | <0.001   | 0.403<br>(0.355,0.451)  | <0.001   | 0.159<br>(0.115,0.203)   | <0.001   | 0.16<br>(0.113,0.206)     | <0.001   |
| <b>NIE</b>          | 0<br>(-0.001,0)          | 0.7135   | 0 (0,0)                 | 0.657    | 0.005 (0,0.01)         | 0.047    | 0.001<br>(-0.001,0.003) | 0.412    | -0.001<br>(-0.001,0)     | 0.076    | -0.003<br>(-0.003,-0.002) | <0.001   |
| <b>NDE</b>          | 0.299<br>(0.215,0.383)   | <0.001   | 0.349<br>(0.291,0.407)  | <0.001   | 0.338<br>(0.25,0.426)  | <0.001   | 0.402<br>(0.354,0.45)   | <0.001   | 0.16<br>(0.116,0.203)    | <0.001   | 0.162<br>(0.116,0.209)    | <0.001   |
| <b>PM</b>           | -0.001<br>(-0.007,0.005) | 0.699    | 0<br>(-0.004,0.004)     | 0.88     | 0.017<br>(0.01,0.023)  | <0.001   | 0.002<br>(-0.001,0.005) | 0.139    | -0.004<br>(-0.008,0)     | 0.059    | -0.018<br>(-0.022,-0.014) | <0.001   |



eTable 6 cont.

| Mediators              | Pancreas                   |          |                            |          | Breast                 |          |                          |          |
|------------------------|----------------------------|----------|----------------------------|----------|------------------------|----------|--------------------------|----------|
|                        | Female                     |          | Male                       |          | Female                 |          | Male                     |          |
|                        | Effect size<br>(95%CI)     | <i>P</i> | Effect size<br>(95%CI)     | <i>P</i> | Effect size<br>(95%CI) | <i>P</i> | Effect size<br>(95%CI)   | <i>P</i> |
| <b>Stage</b>           |                            |          |                            |          |                        |          |                          |          |
| <b>TE<sup>a</sup></b>  | 0.106<br>(0.074,0.138)     | <0.001   | 0.213<br>(0.179,0.247)     | <0.001   | 0.271<br>(0.25,0.293)  | <0.001   | 0.546<br>(0.344,0.748)   | 0.003    |
| <b>NIE<sup>b</sup></b> | -0.012 (-<br>0.025,0)      | <0.001   | -0.002 (-<br>0.016,0.012)  | <0.001   | 0.028<br>(0.026,0.03)  | <0.001   | 0.032<br>(0,0.064)       | 0.277    |
| <b>NDE<sup>c</sup></b> | 0.119<br>(0.089,0.148)     | <0.001   | 0.215<br>(0.184,0.246)     | <0.001   | 0.244<br>(0.223,0.265) | <0.001   | 0.514<br>(0.314,0.713)   | 0.005    |
| <b>PM<sup>d</sup></b>  | -0.123 (-0.128,<br>-0.118) | <0.001   | -0.011 (-<br>0.016,-0.006) | <0.001   | 0.115<br>(0.113,0.117) | <0.001   | 0.076<br>(0.061,0.09)    | <0.001   |
| <b>Surgery</b>         |                            |          |                            |          |                        |          |                          |          |
| <b>TE</b>              | 0.109<br>(0.078,0.141)     | <0.001   | 0.188<br>(0.156,0.221)     | <0.001   | 0.103<br>(0.07,0.135)  | <0.001   | 0.567<br>(0.175,0.959)   | 0.005    |
| <b>NIE</b>             | 0.035<br>(0.021,0.049)     | <0.001   | 0.042<br>(0.029,0.056)     | <0.001   | 0.004<br>(0.003,0.005) | <0.001   | 0 (-<br>0.006,0.007)     | 0.899    |
| <b>NDE</b>             | 0.074<br>(0.046,0.102)     | <0.001   | 0.146<br>(0.116,0.175)     | <0.001   | 0.098<br>(0.066,0.131) | <0.001   | 0.567<br>(0.175,0.958)   | 0.005    |
| <b>PM</b>              | 0.331<br>(0.326,0.336)     | <0.001   | 0.242<br>(0.238,0.247)     | <0.001   | 0.042<br>(0.038,0.045) | <0.001   | 0.001 (-<br>0.017,0.019) | 0.914    |

eTable 6 cont.

| Mediators           | Pancreas               |          |                        |          | Breast                     |                 |                          |          |
|---------------------|------------------------|----------|------------------------|----------|----------------------------|-----------------|--------------------------|----------|
|                     | Female                 |          | Male                   |          | Female                     |                 | Male                     |          |
|                     | Effect size<br>(95%CI) | <i>P</i> | Effect size<br>(95%CI) | <i>P</i> | Effect size<br>(95%CI)     | <i>P</i>        | Effect size<br>(95%CI)   | <i>P</i> |
| <b>Radiotherapy</b> |                        |          |                        |          |                            |                 |                          |          |
| <b>TE</b>           | 0.074<br>(0.046,0.102) | <0.001   | 0.147<br>(0.117,0.176) | <0.001   | 0.1<br>(0.067,0.132)       | <0.001          | 0.567<br>(0.175,0.958)   | 0.005    |
| <b>NIE</b>          | 0<br>(-0.001,0.001)    | 0.71     | 0.001 (0,0.002)        | 0.109    | 0.001<br>(0.001,0.002)     | 0.06731<br>2613 | 0 (-<br>0.001,0.001)     | 0.995    |
| <b>NDE</b>          | 0.074<br>(0.046,0.102) | <0.001   | 0.146<br>(0.116,0.175) | <0.001   | 0.098<br>(0.066,0.131)     | <0.001          | 0.567<br>(0.175,0.958)   | 0.005    |
| <b>PM</b>           | -0.003<br>(-0.006,0)   | 0.036    | 0.008<br>(0.005,0.011) | <0.001   | 0.014<br>(0.011,0.018)     | <0.001          | 0 (-<br>0.018,0.018)     | 0.999    |
| <b>Chemotherapy</b> |                        |          |                        |          |                            |                 |                          |          |
| <b>TE</b>           | 0.112<br>(0.083,0.14)  | <0.001   | 0.191<br>(0.161,0.22)  | <0.001   | 0.098<br>(0.065,0.13)      | <0.001          | 0.576<br>(0.183,0.969)   | 0.004    |
| <b>NIE</b>          | 0.037<br>(0.032,0.043) | <0.001   | 0.045<br>(0.039,0.051) | <0.001   | -0.001 (-<br>0.002,0)      | <0.001          | 0.009 (-<br>0.026,0.045) | 0.604    |
| <b>NDE</b>          | 0.074<br>(0.046,0.102) | <0.001   | 0.146<br>(0.116,0.175) | <0.001   | 0.098<br>(0.066,0.131)     | <0.001          | 0.567<br>(0.175,0.958)   | 0.005    |
| <b>PM</b>           | 0.345<br>(0.342,0.348) | <0.001   | 0.252<br>(0.249,0.256) | <0.001   | -0.009 (-<br>0.013,-0.006) | <0.001          | 0.021<br>(0,0.043)       | 0.054    |

<sup>a</sup>Total effect; <sup>b</sup>Natural indirect effect; <sup>c</sup>Natural direct effect; <sup>d</sup>Proportion mediated

**eTable 7. Demographic and Clinical Characteristics of Individuals Included and Excluded**

| <b>Characteristics</b>              | <b>Included<br/>1733906 (81.3)</b> | <b>Excluded<br/>397632 (18.7)</b> | <b><i>P</i></b> |
|-------------------------------------|------------------------------------|-----------------------------------|-----------------|
| <b>Age at diagnosis<sup>a</sup></b> | 63.76 (12.60)                      | 67.79 (14.90)                     | <0.001          |
| <b>Race<sup>b</sup></b>             |                                    |                                   | <0.001          |
| <b>White</b>                        | 1393206 (80.4)                     | 304445 (76.6)                     |                 |
| <b>Black</b>                        | 201295 (11.6)                      | 42183 (10.6)                      |                 |
| <b>Other<sup>c</sup></b>            | 127420 (7.3)                       | 23254 (5.8)                       |                 |
| <b>Unknown</b>                      | 11985 (0.7)                        | 27750 (7.0)                       |                 |
| <b>Sex<sup>b</sup></b>              |                                    |                                   | <0.001          |
| <b>Female</b>                       | 894379 (51.6)                      | 163721 (41.2)                     |                 |
| <b>Male</b>                         | 839527 (48.4)                      | 233911 (58.8)                     |                 |
| <b>Grade<sup>b</sup></b>            |                                    |                                   | <0.001          |
| <b>Grade I</b>                      | 206578 (11.9)                      | 34179 (8.6)                       |                 |
| <b>Grade II</b>                     | 612491 (35.3)                      | 92795 (23.3)                      |                 |
| <b>Grade III</b>                    | 488671 (28.2)                      | 67334 (16.9)                      |                 |
| <b>Grade IV</b>                     | 60788 (3.5)                        | 7827 (2.0)                        |                 |
| <b>Unknown</b>                      | 365378 (21.1)                      | 195497 (49.2)                     |                 |
| <b>Surgery<sup>b</sup></b>          |                                    |                                   | <0.001          |
| <b>No</b>                           | 536914 (31.0)                      | 182464 (45.9)                     |                 |
| <b>Yes</b>                          | 1196992 (69.0)                     | 154303 (38.8)                     |                 |
| <b>Unknown</b>                      | 0 (0.0)                            | 60865 (15.3)                      |                 |
| <b>Radiation<sup>b</sup></b>        |                                    |                                   | <0.001          |
| <b>No/ Unknown</b>                  | 1159441 (66.9)                     | 341790 (86.0)                     |                 |
| <b>Yes</b>                          | 574465 (33.1)                      | 55842 (14.0)                      |                 |
| <b>Chemotherapy<sup>b</sup></b>     |                                    |                                   | <0.001          |
| <b>No/ Unknown</b>                  | 1207743 (69.7)                     | 350252 (88.1)                     |                 |
| <b>Yes</b>                          | 526163 (30.3)                      | 47380 (11.9)                      |                 |

eTable 7 cont.

| <b>Characteristics</b>       | <b>Included<br/>1733906 (81.3)</b> | <b>Excluded<br/>397632 (18.7)</b> | <b><i>P</i></b> |
|------------------------------|------------------------------------|-----------------------------------|-----------------|
| <b>Stage<sup>b</sup></b>     |                                    |                                   | <0.001          |
| <b>Early</b>                 | 1189957 (68.6)                     | 193049 (48.5)                     |                 |
| <b>Advanced</b>              | 543949 (31.4)                      | 48769 (12.3)                      |                 |
| <b>Unknown</b>               | 0 (0.0)                            | 155814 (39.2)                     |                 |
| <b>Insurance<sup>b</sup></b> |                                    |                                   | <0.001          |
| <b>Insured</b>               | 1475410 (85.1)                     | 199736 (50.2)                     |                 |
| <b>Medicaid</b>              | 181047 (10.4)                      | 27051 (6.8)                       |                 |
| <b>Uninsured</b>             | 39962 (2.3)                        | 6337 (1.6)                        |                 |
| <b>Unknown</b>               | 37487 (2.2)                        | 164508 (41.4)                     |                 |
| <b>Poverty<sup>a</sup></b>   | 32.40 (9.55)                       | 32.47 (9.62)                      | <0.001          |
| <b>Education<sup>a</sup></b> | 14.87 (6.17)                       | 14.76 (6.15)                      | <0.001          |
| <b>Residence<sup>b</sup></b> |                                    |                                   | <0.001          |
| <b>Metropolitan</b>          | 1531155 (88.3)                     | 350231 (88.1)                     |                 |
| <b>Nonmetropolitan</b>       | 201258 (11.6)                      | 46226 (11.6)                      |                 |
| <b>Unknown</b>               | 1493 (0.1)                         | 1175 (0.3)                        |                 |

<sup>a</sup>Mean (SD); <sup>b</sup>N (%) includes American Indian, Alaska Native, and Asian/Pacific Islander
